1 **Cbln1 regulates axon growth and guidance in multiple neural regions**

2

3 **Short title: Cbln1 is an axon growth and guidance cue**

4

5 Peng Han<sup>1,†</sup>, Yuanchu She<sup>1,†</sup>, Zhuoxuan Yang<sup>1</sup>, Mengru Zhuang<sup>1</sup>, Qingjun Wang<sup>1</sup>, Xiaopeng Luo<sup>1</sup>,

6 Chaoqun Yin<sup>1</sup>, Junda Zhu<sup>1</sup>, Samie R. Jaffrey<sup>2\*</sup>, Sheng-Jian Ji<sup>1\*</sup>

7

8 <sup>1</sup>School of Life Sciences, Department of Biology, Shenzhen Key Laboratory of Gene Regulation and

9 Systems Biology, Brain Research Center, Southern University of Science and Technology, Shenzhen,

10 Guangdong 518055, China.

11 <sup>2</sup>Department of Pharmacology, Weill Cornell Medicine, Cornell University, New York, NY 10065, USA.

12

13 <sup>†</sup>These authors contributed equally to this work

14 \*For correspondence: [srj2003@med.cornell.edu](mailto:srj2003@med.cornell.edu); [jjisj@SUSTech.edu.cn](mailto:jjisj@SUSTech.edu.cn)

15

16

17

18 **Abstract**

19 The accurate construction of neural circuits requires the precise control of axon growth and guidance,  
20 which is regulated by multiple growth and guidance cues during early nervous system development.

21 It is generally thought that the growth and guidance cues that control the major steps of axon  
22 guidance have been defined. Here, we describe cerebellin-1 (Cbln1) as a novel cue that controls  
23 diverse aspects of axon growth and guidance throughout the central nervous system (CNS). Cbln1  
24 has previously been shown to function in late neural development to influence synapse organization.  
25 Here we find that Cbln1 has an essential role in early neural development. Cbln1 is expressed on the  
26 axons and growth cones of developing commissural neurons and functions in an autocrine manner to  
27 promote axon growth. Cbln1 is also expressed in intermediate target tissues and functions as an  
28 attractive guidance cue. We find that these functions of Cbln1 are mediated by neurexin-2 (Nrxn2),  
29 which functions as the Cbln1 receptor for axon growth and guidance. In addition to the developing  
30 spinal cord, we further show that Cbln1 functions in diverse parts of the CNS with major roles in  
31 cerebellar parallel fiber growth and retinal ganglion cell axon guidance. Despite the prevailing role of  
32 Cbln1 as a synaptic organizer, our study discovers a new and unexpected function for Cbln1 as a  
33 general axon growth and guidance cue throughout the nervous system.

34

35

36 **Impact statement**

37 Despite the prevailing role of Cbln1 as a synaptic organizer, our study discovers a new and  
38 unexpected function for Cbln1 as a general axon growth and guidance cue throughout the nervous  
39 system.

40

41 **Keywords:** Cbln1, axon guidance, commissural axon, floor plate, cerebellum, optic chiasm

42

## 43 Introduction

44 The precise control of axon pathfinding is critical for the correct neural wiring during nervous system  
45 development. The stimulation of axon growth and regulation of axon guidance have been shown to  
46 require adhesion molecules, diffusible signals and morphogens such as Netrins (**Moreno-Bravo et al.**  
47 **2019; Wu et al. 2019**), Slits (**Brose et al. 1999; Kidd et al. 1999; Zou et al. 2000**), Ephrins (**Paixao et al.**  
48 **2013**), Semaphorins (**Zou et al. 2000; Nawabi et al. 2010**), Draxin (**Islam et al. 2009**), Shh (**Okada et**  
49 **al. 2006**), Wnts (**Lyuksyutova et al. 2003**), and BMPs (**Augsburger et al. 1999; Butler and Dodd 2003**).  
50 These axon guidance molecules bind to their receptors in the axon growth cones to activate various  
51 signaling pathways that eventually change the cytoskeleton (**McCormick and Gupton 2020**). The lack  
52 of newly identified cues in the past decade has suggested that the major classes of growth and  
53 guidance cues have now been identified.

54 The commissures in the rodent spinal cord are one of the most prominent model systems to  
55 study axon growth and guidance. In a search for the differentially expressed genes in the dorsal  
56 spinal cord of mouse embryos, we identified a gene encoding the secreted protein cerebellin-1  
57 (Cbln1). Cbln1 is released from cerebellar parallel fibers and has previously been characterized as a  
58 synaptic organizer by forming the synapse-spanning tripartite complex Nrnx-Cbln1-GluD2 (Nrnx,  
59 neurexin; GluD2, the ionotropic glutamate receptor family member delta-2) (**Yuzaki 2018; Suzuki et**  
60 **al. 2020**). However, whether Cbln1 is expressed and plays roles in earlier nervous system  
61 development is unknown.

62 Here we found that Cbln1 is expressed both in the dorsal commissural neurons (DCN) and in the  
63 floor plate (FP) of the embryonic mouse spinal cord. We generated DCN- and FP-specific *Cbln1*  
64 conditional knockout (cKO) mice which demonstrated that the cell-autonomous and non-cell-  
65 autonomous Cbln1 from DCNs and FP regulate commissural axon growth and guidance, respectively.  
66 The dual roles of Cbln1 are mediated by its receptor, neurexin-2. Interestingly, the functions and  
67 mechanisms of Cbln1 in regulating axon growth and guidance were replicated in the developing  
68 cerebellar granule axon growth and the embryonic retinal ganglion cell axon guidance, respectively.

69 Together, our findings reveal a general role for Cbln1 in regulating axon growth and guidance during  
70 early nervous system development prior to synapse formation.

71

72

## 73 **Results**

### 74 **Cbln1 is expressed in both dorsal commissural neurons and floor plate in the developing mouse** 75 **spinal cord**

76 To identify the differentially expressed genes in the mouse embryonic dorsal spinal cord, we  
77 genetically labeled embryonic dorsal spinal neurons with eGFP by crossing *Wnt1-cre* (**Danielian et al.**  
78 **1998; Charron et al. 2003**) with *Rosa26mTmG* (**Muzumdar et al. 2007**) mice (*Figure 1—figure*  
79 *supplement 1A*). Mouse embryonic E10.5, E11.5 and E12.5 spinal cords were dissected, and dorsal  
80 spinal neurons were collected (*Figure 1—figure supplement 1B*). Then GFP<sup>+</sup> dorsal spinal neurons  
81 were purified by fluorescence-activated cell sorting (FACS) and the differentially expressed genes  
82 (DEGs) during the developmental stages were identified by the expression profiling analysis using  
83 microarray analysis (*Figure 1—figure supplement 1C* and *Supplementary file 1*). We carried out *in situ*  
84 hybridization to further explore the expression patterns of the candidate DEGs in the developing  
85 spinal cord. Among the candidates, *Cbln1* was notable due to its expression pattern. *Cbln1* has strong  
86 signals in floor plate (FP) and weak signals in dorsal commissural neurons (DCNs) at E10.5 (*Figure 1A*).  
87 At E11.5 and E12.5, the expression of *Cbln1* increases in DCNs (notice DCNs migrate ventrally and  
88 medially at E12.5), maintains a high level in FP, and also appears in subpopulations of motor neurons  
89 (*Figure 1A*).

90 To further explore the expression patterns of Cbln1 protein and confirm its expression sites, we  
91 carried out immunofluorescence (IF) using a Cbln1 antibody (**Muguruma et al. 2010**). Co-  
92 immunostaining of Cbln1 with Lhx2, a DCN marker (**Wilson et al. 2008**), confirmed the expression of  
93 Cbln1 in DCNs of developing spinal cords from E10.5 to E12.5 (*Figure 1B-D*). Expression of Cbln1 in FP  
94 was also confirmed by co-immunostaining with the FP marker Alcam (*Figure 1B-D*). To validate the

95 specificity of Cbln1 expression in FP, we used a spinal floor plate-deficient model, *Gli2* knockout (KO)  
96 mouse (**Bai and Joyner 2001**). As shown in *Figure 1—figure supplement 1D*, IF signal of Cbln1 in  
97 Alcam-marked FP was gone in *Gli2* KO. These results revealed an interesting expression pattern for  
98 Cbln1 that is expressed both in the dorsal commissural neurons (DCNs) and in the intermediate  
99 target for DCNs, the floor plate.

100

101 **Cell-autonomous Cbln1 in the dorsal commissural neurons stimulates commissural axon growth in**  
102 **an autocrine manner**

103 Next, we wanted to explore the roles of Cbln1 expressed in DCNs and floor plate, separately. In order  
104 to specifically ablate *Cbln1* from these tissues, we generated conditional knockouts (cKO) of *Cbln1*  
105 using tissue-specific *Cre* lines (*Figure 2—figure supplement 1A*). We used *Wnt1-Cre* line to specifically  
106 ablate *Cbln1* from spinal DCNs, without affecting *Cbln1* expression in other parts of spinal cord  
107 (*Figure 2A*). *Cbln1* cKO in spinal DCNs does not disturb neurogenesis of these neurons, as indicated  
108 by normal numbers, distribution and patterning of Lhx2<sup>+</sup> and Lhx9<sup>+</sup> interneurons in the developing  
109 spinal cord (*Figure 2—figure supplement 1B-D*). We continued to check commissural axon (CA)  
110 growth in DCN-specific *Cbln1* cKO. We prepared open-books of developing spinal cords and used  
111 Robo3 immunostaining to label commissural axons. Robo3 selectively marks commissural axons as  
112 they navigate to and across the floor plate (**Sabatier et al. 2004**). As shown in *Figure 2B-D*, both  
113 lengths and numbers of commissural axons were decreased in *Cbln1* cKO embryos compared with  
114 their littermate controls. These data suggest that Cbln1 in the dorsal commissural neurons is  
115 required for their own commissural axon growth.

116 To further test whether Cbln1 is sufficient to stimulate commissural axon growth *in vivo*, we  
117 used a model of chick neural tube. Chick *Cbln1* (*cCbln1*) is expressed in the dorsal commissural  
118 neurons (DCN) of developing chick neural tube, as is the case with mouse *Cbln1*, but is not detected  
119 in the floor plate of chick embryonic spinal cord (*Figure 2—figure supplement 1E*). We made a DCN-  
120 specific overexpression plasmid, pMath1-eGFP-IRES-MCS, by modifying a DCN-specific knockdown

121 plasmid pMath1-eGFP-miRNA (**Wilson and Stoeckli 2013**). Unilateral DCN-specific overexpression of  
122 *cCbln1* by *in ovo* electroporation of pMath1-eGFP-IRES-cCbln1 enhanced chick commissural axon  
123 growth compared with control plasmid without changing commissural neuron numbers (*Figure 2E-G*).  
124 These data suggest that Cbln1 is sufficient to stimulate commissural axon growth.

125       Next, we continued to elucidate the mechanisms for the cell-autonomous functions of Cbln1.  
126 We hypothesized that Cbln1 was secreted from the dorsal commissural neurons (DCN) and then  
127 acted to stimulate commissural axon growth in an autocrine manner. To test this, we cultured DCN  
128 explants from E10.5 (a stage when most commissural axons have not projected to the midline yet  
129 and are called pre-crossing axons) mouse spinal cords and used Tag1 immunostaining to visualize  
130 pre-crossing commissural axons. Tag1 has been widely used as a marker for pre-crossing  
131 commissural axons (**Chen et al. 2008; Colak et al. 2013**). Compared with control embryonic DCN  
132 explants, the commissural axon growth of Wnt1-Cre-mediated *Cbln1* cKO DCNs was significantly  
133 inhibited, indicated by decreased axon numbers and reduced axon lengths (*Figure 3A-C*), which is  
134 consistent with *in vivo* results for DCN-specific *Cbln1* cKO (*Figure 2B-D*). These axon growth defects  
135 were efficiently rescued by adding a recombinant human Cbln1 protein (rhCbln1) to the cultures  
136 (*Figure 3A-C*). These data suggest that the cell-autonomous Cbln1 regulates commissural axon  
137 growth in an autocrine manner.

138       We next asked whether Cbln1-induced axonal growth works locally in commissural axons and  
139 growth cones. Immunofluorescence of DCN neuron culture using a Cbln1 antibody detected robust  
140 Cbln1 IF signals in commissural axons and growth cones (*Figure 3D*). To confirm the specificity of  
141 these axonal Cbln1 IF signals, we generated lentiviral *shCbln1* which led to dramatic knockdown of  
142 *Cbln1* in cultured neurons (*Figure 3—figure supplement 1A*). The Cbln1 IF signals in commissural  
143 axons and growth cones were largely lost after knockdown of Cbln1 (*Figure 3D,E*), indicating that  
144 Cbln1 is present in commissural axons and growth cones.

145       To test whether Cbln1 is exocytosed from axons, we applied glycyl-L-phenylalanine 2-  
146 naphthylamide (GPN) to the DCN cultures. GPN can be specifically cleaved by cathepsin C, which

147 leads to targeted disruption of the lysosomal membrane (**Padamsey et al. 2017; Iyata et al. 2019**).  
148 Treatment of DCN cultures with GPN, followed by an IF protocol to detect surface Cbln1 by leaving  
149 out the permeabilization steps, showed a loss of Cbln1 IF signals on the commissural axon surface  
150 (**Figure 3F,G**), suggesting that Cbln1 is released from lysosomes in commissural axons and growth  
151 cones. Blocking Cbln1 secretion by GPN inhibited commissural axon growth (**Figure 3H**), further  
152 supporting a model that Cbln1 is released from and works back on commissural axon and growth  
153 cones to stimulate axon growth.

154

### 155 **Non-cell-autonomous Cbln1 from the floor plate regulates commissural axon guidance**

156 The facts that the secreted Cbln1 works extrinsically and that it is expressed in the floor plate (FP)  
157 during commissural axon growth to the midline suggest that Cbln1 from FP might regulate  
158 commissural axon guidance. To test this idea, we first prepared COS7 cell lines stably expressing  
159 mouse Cbln1. High levels of Cbln1 were detected in the culture media, indicating the overexpressed  
160 Cbln1 was secreted from COS7 cells (**Figure 4—figure supplement 1A**). We then co-cultured the  
161 dorsal spinal cord explants from E11 mouse embryos with COS7 cell aggregates expressing Cbln1  
162 tagged with FLAG and GFP or GFP alone in collagen gels (**Figure 4A**). The dorsal spinal cord explants  
163 growing with Cbln1-expressing COS7 cell aggregates had significantly longer axons than the control  
164 (**Figure 4A,B**). More importantly, the growth of commissural axons was attracted toward Cbln1-  
165 expressing COS7 cell aggregates, indicated by the higher axon number ratios (Proximal/Distal)  
166 compared with the control cell aggregates expressing GFP alone (**Figure 4A,C**). These results suggest  
167 that the non-cell-autonomous Cbln1 functions as an attractive axon guidance molecule.

168 To assess the *in vivo* functions of the non-cell-autonomous Cbln1, we generated floor plate-  
169 specific *Cbln1* cKO mice. We utilized *Foxa2-Cre<sup>ERT</sup>* line which has been used to induce Cre  
170 recombinase expression specifically in floor plate cells in response to tamoxifen (TM) treatment  
171 (**Park et al. 2008; Hernandez-Enriquez et al. 2015**). *Cbln1* expression was specifically ablated from  
172 the floor plate in these cKO embryos, without affecting its expression in other parts of spinal cord

173 including the dorsal commissural neurons (DCNs) (*Figure 4D*). The neural patterning or neurogenesis  
174 was not disturbed by ablation of *Cbln1* from the floor plate (FP) (*Figure 4—figure supplement 1B-E*).  
175 However, examination of commissural axon trajectories using Tag1 immunostaining in E11.5 spinal  
176 cords revealed significant axon guidance defects in the midline and ventral spinal cord. First, the  
177 thickness of the ventral commissure (VC) was significantly reduced in the FP-specific *Cbln1* cKO  
178 embryos compared with their littermate controls (*Figure 4E,F*). Second, the intersection of the main  
179 commissural axon bundle with the ventral commissural funiculus was shifted laterally in the FP-  
180 specific *Cbln1* cKO embryos compared with their littermate controls (*Figure 4E*). The distances  
181 between the point of intersection and the midline were quantified, showing a significant increase in  
182 the FP-specific *Cbln1* cKO embryos (*Figure 4G*). These phenotypes were also evident by NFM  
183 immunostaining (*Figure 4—figure supplement 1F-H*). These axon guidance defects suggest that *Cbln1*  
184 from the floor plate indeed works as an axon guidance cue in the developing spinal cord.

185 To observe more clearly the commissural axon guidance behaviors in the FP-specific *Cbln1* cKO  
186 embryos, we performed Dil labeling of DCNs in the open-book spinal cords at E11.5. As shown in  
187 *Figure 4H,I*, there was a significant decrease of the number of normal crossing commissural axons in  
188 the *Cbln1* cKO. Meanwhile, the numbers of commissural axons showing guidance defects such as  
189 ipsilateral turning, slower growing or winding crossing were significantly increased in *Cbln1* cKO  
190 embryos compared with their littermate controls (*Figure 4H,I*).

191 All these data support the idea that the non-cell-autonomous *Cbln1* derived from the floor plate  
192 works as an axon guidance cue for commissural axons in the developing spinal cord.

193

#### 194 **Nrxn2 is expressed in the developing dorsal commissural neurons and axons, and mediates *Cbln1*-** 195 **induced axon growth and guidance as its receptor**

196 Previously *Cbln1* was shown to work as a synaptic organizer for the cerebellar excitatory PF-PC (PF,  
197 parallel fibers; PC, Purkinje cells) synapses by binding to its presynaptic receptor, neurexin (*Nrxn*) and  
198 its postsynaptic receptor, glutamate receptor delta 2 (*GluD2*) (*Matsuda et al. 2010; Uemura et al.*



199 **2010**). In addition, trans-synaptic signaling through Nrnx-Cbln-GluD1 has also been shown to mediate  
200 the inhibitory synapse formation in cortical neurons (*Yasumura et al. 2012; Fossati et al. 2019*). Here  
201 we wondered whether Nrnx, GluD1, and/or GluD2 work as receptors for Cbln1 to mediate its  
202 regulation of commissural axon growth and guidance in the developing spinal cord. To test this, we  
203 first checked if Nrnx, GluD1, and GluD2 are expressed in developing dorsal commissural neurons  
204 (DCNs) or not. *GluD1* or *GluD2* mRNA was not detected in E11.5 spinal cords (*Figure 5—figure*  
205 *supplement 1A*). There are three *Nrxn* genes in the mammalian genome, each of them encoding two  
206 major protein isoforms,  $\alpha$ -neurexin and  $\beta$ -neurexin (*Reissner et al. 2013*). Although *Nrxn1*, 2 and 3  
207 mRNAs were all detected in E11.5 spinal cords, only *Nrxn2* mRNA was found to be expressed in DCNs  
208 (*Figure 5A*). We further detected both *Nrxn2 $\alpha$*  and *Nrxn2 $\beta$*  mRNAs in DCNs using the isoform-specific  
209 probes (*Figure 5B*). Immunostaining using an Nrnx2 antibody detected robust Nrnx2 IF signals in  
210 commissural axons and growth cones (*Figure 5C,D*), making it possible that Nrnx2 works as the  
211 receptor for Cbln1 in developing commissural axons. Indeed, commissural axon lengths were  
212 significantly decreased after knocking down either pan-Nrxn2 or Nrnx2 $\alpha$ , Nrnx2 $\beta$  separately (*Figure*  
213 *5—figure supplement 1B-D*, and *Figure 5E,F*), suggesting that Nrnx2 mediates cell-autonomous-  
214 Cbln1-induced commissural axon growth. We continued to test whether Nrnx2 also mediates the  
215 non-cell-autonomous function of Cbln1 to attract commissural axon turning. As shown in *Figure 5G*,  
216 Cbln1-expressing cell aggregates failed to attract commissural axons of DCN neurons which were  
217 knocked down of either pan-Nrxn2 or Nrnx2 $\alpha$ , Nrnx2 $\beta$  separately. These data suggest that Nrnx2  
218 (both Nrnx2 $\alpha$  and Nrnx2 $\beta$ ) works as the receptor for Cbln1 to mediate its cell-autonomous function  
219 in axon growth and non-cell-autonomous function in axon guidance of commissural neurons in the  
220 developing spinal cord.

221 In summary, these data and findings support the following working model for Cbln1 in the  
222 developing spinal cord (*Figure 5—figure supplement 1E,F*). In the pre-crossing commissural axons,  
223 Cbln1 is expressed cell-autonomously by the dorsal commissural neurons (DCN) and axons.  
224 Commissural axon growth cone-secreted Cbln1 binds to Nrnx2 receptors in commissural axons and

225 growth cones to stimulate commissural axon growth in an autocrine manner (*Figure 5—figure*  
226 *supplement 1E*). In the DCN-specific *Cbln1* cKO embryos, commissural axon growth is reduced  
227 compared with their littermate controls (*Figure 5—figure supplement 1E*). When commissural axons  
228 approach the midline, the floor plate-derived *Cbln1* attracts commissural axons to the midline which  
229 is also mediate by *Nrxn2* receptors (*Figure 5—figure supplement 1F*). In the floor plate-specific *Cbln1*  
230 cKO embryos, commissural axon guidance in the midline crossing is impaired, resulting in a U-shaped  
231 and thinner ventral commissure compared with the V-shaped and thick ventral commissures in the  
232 littermate control embryos (*Figure 5—figure supplement 1F*).

233

### 234 **Cell-autonomous *Cbln1* from cerebellar granular cells is required for parallel fiber growth**

235 We wondered whether the function of *Cbln1* to regulate axon development is a general mechanism  
236 which also works in other brain regions during development. The studies on *Cbln1* so far have been  
237 focused on its functions as a synaptic organizer in cerebellum. Whether *Cbln1* is expressed and exerts  
238 its functions at earlier stages of cerebellar development remains unexplored. We first checked  
239 expression of *Cbln1* in earlier cerebellar development. As shown in *Figure 6A*, high and specific *Cbln1*  
240 expression was detected in the P4-P8 cerebellar granule cells in the inner granule layer (IGL) by *in*  
241 *situ* hybridization. Immunofluorescence using a *Cbln1* antibody showed that *Cbln1* protein is  
242 enriched in the molecular layer (ML) of cerebellum (*Figure 6B*), suggesting that *Cbln1* protein is  
243 expressed and secreted by cerebellar granule cell (GC) axons.

244 Next we tested the possible roles of *Cbln1* in earlier cerebellar development. We generated  
245 *Cbln1* cKO in cerebellum using the *Wnt1-cre* line (**Danielian et al. 1998; Cerrato et al. 2018**), which  
246 resulted in the efficient knockout of *Cbln1* from GCs (*Figure 6C*). Axon growth rates of *Cbln1*-deficient  
247 GCs *in vitro* were significantly decreased compared with control neurons (*Figure 6D,E*), suggesting  
248 that the cell-autonomous *Cbln1* is required for GC axon growth. Similar to *Cbln1* on commissural  
249 axons, extrinsic application of the recombinant h*Cbln1* (rh*Cbln1*) protein to the GC axons stimulated  
250 their growth (*Figure 6F*), supporting a similar model as in the developing spinal cord that *Cbln1*

251 secreted from cerebellar GC axons works back to stimulate GC axon growth in the developing  
252 cerebellum. Detection of *Nrxn1*, *2*, and *3* expression in GCs at IGL (*Figure 6—figure supplement 1A,B*)  
253 implied that neurexins would mediate the autocrine function of Cbln1 to stimulate GC axon growth  
254 in the developing cerebellum as in the spinal cord.

255 We continued to carefully examine the *Cbln1* cKO cerebella. Immunostaining of the Purkinje cell  
256 (PC) marker Calbindin and the granule cell (GC) marker NeuN showed no difference between *Cbln1*  
257 cKO and control cerebella at P8 (*Figure 6G*), suggesting that the neurogenesis of PC and GC in the  
258 cerebellum is not impaired. To investigate whether the *in vitro* regulation of GC axon growth by  
259 Cbln1 was recapitulated *in vivo*, we examined parallel fiber (PF) development in *Cbln1* cKO mice by  
260 Dil labeling. Compared with control mice, the Dil-labeled parallel fiber lengths in *Cbln1* cKO mouse  
261 pups at P6 were significantly decreased (*Figure 6H,I*), indicating that the parallel fiber growth was  
262 impaired in *Cbln1* cKO cerebella.

263 All these data suggested that cell-autonomous Cbln1 from granule cells is required for parallel  
264 fiber growth in the developing cerebellum, just as cell-autonomous Cbln1 from commissural axons  
265 stimulates CA axon growth in the developing spinal cord.

266

### 267 **Non-cell-autonomous Cbln1 regulates axon guidance of retinal ganglion cells in the optic chiasm**

268 The regulation of commissural axon guidance during midline crossing by the non-cell-autonomous  
269 Cbln1 from floor plate of the developing spinal cord inspired us to further test whether Cbln1  
270 regulates axon guidance in other brain midline models. The optic chiasm (OC) is where retinal  
271 ganglion cell (RGC) axons from each eye cross the midline. The ipsi- and contra-lateral axon  
272 organization of RGC axons in OC is critical for binocular vision (**Mason and Slavi 2020**). We wanted to  
273 check whether Cbln1 contributed to axon guidance signaling in OC. RGCs do not express *Cbln1*  
274 (*Figure 7A*). However, both *Cbln1* mRNA and Cbln1 protein were detected in the ventral  
275 diencephalon at the floor of the third ventricle which is adjacent to OC (*Figure 7B,C*), implying that  
276 Cbln1 has the right location to exert effects on OC. *In vitro* co-culture of retinal explants with COS7

277 cell aggregates expressing Cbln1 showed that Cbln1 is sufficient to attract RGC axon turning (*Figure*  
278 *7D*).

279 We next continued to explore whether Cbln1 physiologically regulates RGC axon guidance in OC  
280 at the ventral diencephalic midline. We generated *Cbln1* cKO embryos using *Nes-cre*. As show in  
281 *Figure 7E*, *Cbln1* expression in the ventral diencephalon was ablated. RGCs can be divided to  
282 ipsilateral and contralateral subgroups according to their projection laterality to the same or  
283 opposite side of the brain, respectively. The experiments checking expression of Cbln1 receptors in  
284 retina by *in situ* hybridization revealed that only *Nrxn1* and *Nrxn2* mRNA were detected in the  
285 developing retina (*Figure 7F*) while *Nrxn3*, *GluD1* or *GluD2* mRNA was not detected (*Figure 7—figure*  
286 *supplement 1A,B*). *Nrxn2* was further found to be only expressed in the contralateral RGCs marked by  
287 *Brn3a* (*Figure 7G*), suggesting that Cbln1 would only work on the contralateral RGCs. Consistent with  
288 this, Dil tracing of RGC axons showed that contralateral axon attraction to OC was impaired in the  
289 *Cbln1* cKO mouse embryos compared with control embryos (*Figure 7H,I*). We further checked the  
290 targeting of optic nerves to the brain by anterograde labeling with cholera toxin subunit B (CTB) and  
291 found that the ratio of ipsilateral area to contralateral area of the retinogeniculate projections was  
292 increased in *Cbln1* cKO pups compared with control pups (*Figure 7J,K*). These data suggest that the  
293 non-cell-autonomous Cbln1 regulates contralateral RGC axon guidance in the optic chiasm.

294

## 295 **Discussion**

296 Based on the *in vitro* and *in vivo* studies in mice, we have demonstrated that cell-autonomous and  
297 non-cell-autonomous Cbln1 regulates axon growth and guidance in multiple neural regions,  
298 respectively, suggesting a general role for Cbln1 in early nervous system development.

299 Studies on Cbln1 so far have focused on its role as the synaptic organizer in cerebellum (*Hirai et*  
300 *al. 2005; Matsuda et al. 2010; Uemura et al. 2010; Ito-Ishida et al. 2012; Yuzaki 2018; Iyata et al.*  
301 *2019; Suzuki et al. 2020; Takeo et al. 2020*) and cortex (*Fossati et al. 2019*). Whether Cbln1 works in  
302 earlier neuronal developmental processes prior to synapse formation or in other neural regions is not

303 known. Here we report that Cbln1 is expressed in developing spinal cord, cerebellum, and ventral  
304 diencephalon. We also found that Cbln1 regulates axon growth and guidance in multiple neural  
305 regions. These findings suggest that Cbln1 has dynamic spatial-temporal expression and function in  
306 the nervous system. Thus, in order to distinguish the early (axon development) and late (synapse  
307 formation) roles of Cbln1, it would be critical to more precisely control the timepoint of knocking out  
308 *Cbln1*. For example, inducible *Cbln1* cKO would be necessary to explore its roles in synapse formation,  
309 in order to avoid disrupting its role in axon pathfinding.

310 During neural developmental stages before synapse formation, extracellular cues are required  
311 to direct axon growth and guidance (**Stoeckli 2018**). Most of these cues are non-cell-autonomous and  
312 secreted by sources such as the surrounding and target (intermediate or final) tissues. Here we found  
313 that non-cell-autonomous Cbln1 expressed and secreted from floor plate in the developing spinal  
314 cord and from ventral diencephalon in the developing brain works in a paracrine manner to regulate  
315 commissural axon and retinal ganglion axon guidance when they cross the midline.

316 In addition, we also found that cell-autonomous Cbln1 which is generated and secreted from  
317 commissural and cerebellar granule cell axons works in an autocrine manner to stimulate their own  
318 axon growth. Actually, other examples that axon-derived and remotely secreted cues regulate axon  
319 development have also been reported. The axonally secreted protein axonin-1 promotes neurite  
320 outgrowth of dorsal root ganglia (DRG) (**Stoeckli et al. 1991**). Wnt3a is expressed in RGCs and has the  
321 autocrine RGC axon growth-promoting activity (**Harada et al. 2019**). The C terminus of the ER stress-  
322 induced transcription factor CREB3L2 was found to be secreted by DRG axons to promote DRG axon  
323 growth (**McCurdy et al. 2019**). Recent study suggests that axonally synthesized Wnt5a is secreted  
324 and promote cerebellar granule axon growth in an autocrine manner (**Yu et al. 2021**).

325 Thus, Cbln1 shows up as an example of molecules with dual roles as both non-cell-autonomous  
326 and cell-autonomous cues to regulate axon guidance and growth, respectively.

327 We found that neurexins, esp. Nrnx2, mediate Cbln1 functions in axon development. Neurexins  
328 are transmembrane proteins with a large extracellular region and a small intracellular C-terminal

329 region (**Reissner et al. 2013**). *Nrxns* are alternatively spliced at six sites (named as SS1 to SS6)(**Sudhof**  
 330 **2017**), whereas Cbln1 only bind to SS4+ neurexins (**Uemura et al. 2010**). Extracellularly,  $\alpha$ -*Nrxns* bind  
 331 to Cbln1 via the LNS6 domain (laminin/neurexin/sex-hormone-binding globulin domain 6) which is  
 332 also shared by  $\beta$ -*Nrxns* (**Sudhof 2017**). Intracellularly, *Nrxns* interact with CASK, Mints, and protein  
 333 4.1 which nucleates actin cytoskeleton to regulate synapse formation (**Hata et al. 1996; Biederer and**  
 334 **Südhof 2000; Biederer and Sudhof 2001; Mukherjee et al. 2008**). It will be interesting to explore  
 335 whether and how Cbln1-*Nrxn* signaling is mediated by intracellular CASK/Mint/p4.1-cytoskeleton  
 336 pathway to regulate axon growth and guidance in the early neuronal development.

337

## 338 **Materials and methods**

### 339 **Key resources table**

| Reagent type (species)or resource      | Source or reference       | Identifiers                              |
|----------------------------------------|---------------------------|------------------------------------------|
| <b>Antibodies</b>                      |                           |                                          |
| Goat polyclonal anti-Alcam             | R&D Systems               | Cat# AF656, RRID: AB_355509              |
| Rabbit polyclonal anti-Cbln1           | Abcam                     | Cat# ab64184, RRID: AB_1140961           |
| Rabbit polyclonal anti-Cbln1           | Frontier Institute        | Cat# Cbln1-Rb-Af270, RRID:<br>AB_2571672 |
| Rabbit polyclonal anti-Cbln1           | Abclonal                  | N/A (customized)                         |
| Chicken polyclonal anti-GFP            | Abcam                     | Cat# ab13970, RRID: AB_300798            |
| Goat polyclonal anti-Lhx9              | Santa Cruz Biotechnology  | Cat# sc-19350, RRID: AB_2249920          |
| Rabbit monoclonal anti-Lhx2            | Abcam                     | Cat# ab184337                            |
| Mouse monoclonal anti-Isl1/2           | DSHB                      | Cat# 39.4D5, RRID, AB_2314683            |
| Rabbit polyclonal anti-Nrxn2           | Abcam                     | Cat# ab34245, RRID: AB_776702            |
| Rabbit monoclonal anti-NeuN            | Cell Signaling Technology | Cat# 24307, RRID: AB_2651140             |
| Rabbit monoclonal anti-Neurofilament-L | Cell Signaling Technology | Cat# 2837, RRID: AB_823575               |
| Goat polyclonal anti-Robo3             | R&D Systems               | Cat# AF3076, RRID: AB_2181865            |
| Goat polyclonal anti-Tag1              | R&D Systems               | Cat# AF1714, RRID, AB_2245173            |
| Mouse monoclonal anti-Brn3a            | Millipore                 | Cat# MAB1585, RRID: AB_94166             |
| Mouse monoclonal anti-Calbindin        | Swant                     | Cat# 300, RRID: AB_10000347              |
| Mouse monoclonal anti-Tuj1             | Abcam                     | Cat# ab78078, RRID: AB_2256751           |
| Mouse monoclonal anti- $\beta$ -actin  | Abcam                     | Cat# ab6276, RRID: AB_2223210            |
| Mouse monoclonal anti-FLAG             | Beyotime                  | Cat# AF519                               |
| Alexa 555 donkey anti-goat IgG         | Thermo                    | Cat# A-21432, RRID: AB_2535853           |
| Alexa 555 donkey anti-rabbit IgG       | Thermo                    | Cat# A-31572, RRID: AB_162543            |
| Alexa 488 donkey anti-mouse IgG        | Thermo                    | Cat# A-21202, RRID: AB_141607            |
| Alexa 488 donkey anti-rabbit IgG       | Thermo                    | Cat# A-21206, RRID: AB_2535792           |
| Alexa 488 donkey anti-goat IgG         | Thermo                    | Cat# A-11055, RRID: AB_2534102           |

|                                                                               |                        |                                    |
|-------------------------------------------------------------------------------|------------------------|------------------------------------|
| Alexa 488 donkey anti-chicken IgY                                             | Jackson ImmunoResearch | Cat# 703-545-155, RRID: AB_2340375 |
| HRP donkey anti-mouse IgG                                                     | Abcam                  | Cat# ab97030, RRID: AB_10680919    |
| HRP donkey anti-rabbit IgG                                                    | Abcam                  | Cat# ab16284, RRID: AB_955387      |
| HRP VHH anti-mouse IgG                                                        | AlpaLife               | Cat# KTSM1321                      |
| HRP VHH anti-rabbit IgG                                                       | AlpaLife               | Cat# KTSM1322                      |
| <b>Chemicals, Peptides, and Recombinant Proteins</b>                          |                        |                                    |
| Tamoxifen                                                                     | Cayman                 | Cat# 13258                         |
| Lipofectamine 3000 Transfection Reagent                                       | Thermo                 | Cat# L3000-001                     |
| Recombinant Human Cerebellin-1 Protein                                        | R&D Systems            | Cat# 6934-CB-025                   |
| ChamQ™ Universal SYBR qPCR Master Mix                                         | Vazyme                 | Cat# Q711-02                       |
| DIG RNA labeling Kit (SP6/T7)                                                 | Roche                  | Cat# 11175025910                   |
| tRNA                                                                          | Roche                  | Cat# 10109495001                   |
| Anti-Digoxigenin-AP                                                           | Roche                  | Cat# 11093274910                   |
| NBT/BCIP                                                                      | Roche                  | Cat# 11681451001                   |
| DMEM, high glucose                                                            | Hyclone                | Cat# SH30243.01                    |
| Dulbecco's Modified Eagle's Medium, 10×, low glucose                          | Sigma                  | Cat# D2429                         |
| Fetal Bovine Serum (FBS)                                                      | Gibco                  | Cat# 10099-141                     |
| Dulbecco's Phosphate-Buffered Saline, 1× without calcium and magnesium (DPBS) | Corning                | Cat# 21-031-CV                     |
| Laminin I (mouse), Culrex                                                     | Trevigen               | Cat# 3400-010-01                   |
| Insulin                                                                       | Sigma                  | Cat# I6634                         |
| B27 serum-free supplement, 50×                                                | Gibco                  | Cat# 17504044                      |
| DMEM/F-12, GlutaMAX™                                                          | Gibco                  | Cat# 10565-018                     |
| Neurobasal Medium                                                             | Gibco                  | Cat# 21103-049                     |
| Neurobasal-A Medium                                                           | Gibco                  | Cat# 10888-022                     |
| Basal Medium Eagle                                                            | Gibco                  | Cat# 21010046                      |
| Penicillin-Streptomycin                                                       | Gibco                  | Cat# 15140-122                     |
| N-2 Supplement, 100×                                                          | Gibco                  | Cat# 17502-048                     |
| Poly-D-Lysine                                                                 | Trevigen               | Cat# 3439-100-01                   |
| Glucose                                                                       | Sigma                  | Cat# G8644                         |
| HBSS                                                                          | Gibco                  | Cat# 14175095                      |
| Trypsin                                                                       | Sigma                  | Cat# 59427C                        |
| DNase I                                                                       | sigma                  | Cat# DN25                          |
| Puromycin                                                                     | Sigma                  | Cat# P8833                         |
| Paraformaldehyde                                                              | Sigma                  | Cat# V900894                       |
| O.C.T. Compound and Cryomolds, Tissue-Tek                                     | SAKURA                 | Cat# 4583                          |
| Triton x-100                                                                  | Sigma                  | Cat# V900502                       |
| Mounting Medium, antifading (with DAPI)                                       | Beyotime               | Cat# P0131                         |
| Normal Sheep Serum                                                            | Millipore              | Cat# S22-100ML                     |
| <b>Experimental Models: Cell Lines</b>                                        |                        |                                    |

|                                                                                                     |                             |                                 |
|-----------------------------------------------------------------------------------------------------|-----------------------------|---------------------------------|
| HEK293T                                                                                             | ATCC                        | Cat# CRL-11268, RRID: CVCL_1926 |
| COS-7                                                                                               | ATCC                        | Cat# CRL-1651, RRID: CVCL_0224  |
| Experimental Models:                                                                                |                             |                                 |
| Organisms/Strains                                                                                   |                             |                                 |
| Mouse: <i>Cbln1</i> <sup>fl/fl</sup>                                                                | This paper                  | N/A                             |
| Mouse: Wnt1-cre                                                                                     | Jackson Laboratory          | Cat# JAX_003829                 |
| Mouse: Rosa26mTmG                                                                                   | Jackson Laboratory          | Cat# JAX_007676                 |
| Mouse: Nes-cre                                                                                      | Jackson Laboratory          | Cat# JAX_003771                 |
| Mouse: Foxa2-cre <sup>ERT</sup>                                                                     | Jackson Laboratory          | Cat# JAX_008464                 |
| Mouse: <i>Gli2</i> <sup>+/-</sup>                                                                   | Jackson Laboratory          | Cat# JAX_008464                 |
| Oligonucleotides                                                                                    |                             |                                 |
| Cloning primers for chick <i>Cbln1</i> :<br>Fwd: ATGCGGGGCCCCG<br>Rev: TTAAAGCGGGAACACC             | This paper                  | N/A                             |
| Cloning primers for mouse <i>Cbln1</i> :<br>Fwd: CCGGAGGCGCGATGCT<br>Rev: ATTCCCGATACGTGCCAG        | This paper                  | N/A                             |
| shRNA targeting sequence of negative control pLKO.1-Puro system:<br>GCATCAAGGTGAACTTCAAGA           | This paper                  | N/A                             |
| shRNA targeting sequence of negative control for pLKO.1-GFP system:<br>GCATCAAGGTGAACTTCAAGA        | <b>(Zhuang et al. 2019)</b> | N/A                             |
| shRNA targeting sequence of mouse <i>Cbln1</i> :<br>GGCTGGAAGTACTCAACCTTC                           | This paper                  | N/A                             |
| shRNA targeting sequence of mouse <i>Nrxn2</i> :<br>CGTTCGTTTATTTCCCTCGAT                           | This paper                  | N/A                             |
| shRNA targeting sequence of mouse <i>Nrxn2α</i> :<br>GGACTTCTGCTGTTCAACTCA                          | This paper                  | N/A                             |
| shRNA targeting sequence of mouse <i>Nrxn2β</i> :<br>CTCCCCATACCCGGATTTG                            | This paper                  | N/A                             |
| qPCR primers of mouse <i>Cbln1</i><br>Fwd: CCGAGATGAGTAATCGCACCA<br>Rev:<br>TCAACATGAGGCTCACCTGGATG | This paper                  | N/A                             |
| qPCR primers of mouse <i>Nrxn2</i><br>Fwd: TACCCGGCAGGAACTTTGA<br>Rev: CCCCTATCTTGATGGCAGC          | This paper                  | N/A                             |
| qPCR primers of mouse <i>Nrxn2α</i> :<br>Fwd: CTCAAGTCTGGGGCTGTCTG<br>Rev: ATAGCGTGCCAATCCCTGC      | This paper                  | N/A                             |
| qPCR primers of mouse <i>Nrxn2β</i> :<br>Fwd: GATGGATCCAGGCTTCACGG<br>Rev: GAAGGAAAACAGAGCCCGA      | This paper                  | N/A                             |



|                                                                                                                                                                                                                                                                           |                            |                                                                         |
|---------------------------------------------------------------------------------------------------------------------------------------------------------------------------------------------------------------------------------------------------------------------------|----------------------------|-------------------------------------------------------------------------|
| qPCR primers of mouse <i>Gapdh</i> :<br>Fwd:<br>TTGTCAGCAATGCATCCTGCACCACC<br>Rev:<br>CTGAGTGGCAGTGATGGCATGGAC                                                                                                                                                            | <b>(Mains et al. 2011)</b> | N/A                                                                     |
| Probe primers of chick <i>Cbln1</i> :<br>Fwd: GAGAAGACGCCGCTCAGGTGT<br>Rev: CGGGTTGATTTGCGGTCTTC                                                                                                                                                                          | This paper                 | N/A                                                                     |
| Probe primers of mouse <i>Cbln1</i> :<br>Fwd: CCAAGACGTGACACGCGAG<br>Rev: CAGTAAGTGGCAGGGTTCAG                                                                                                                                                                            | This paper                 | N/A                                                                     |
| Probe primers of mouse <i>Nrxn1</i> :<br>Fwd: CAGGGAATGCGATCAGGAGG<br>Rev: AGACTTCTTCTCTGGCACGC                                                                                                                                                                           | This paper                 | N/A                                                                     |
| Probe primers of mouse <i>Nrxn2</i> :<br>Fwd: TCACAGCCCTGGGTTGATTT<br>Rev: AGCAGCGACACACAAAAG                                                                                                                                                                             | This paper                 | N/A                                                                     |
| Probe primers of mouse <i>Nrxn3</i> :<br>Fwd: GTGAGATGGGGTGTACCACG<br>Rev: ACACACACACTGGTCAGAACC                                                                                                                                                                          | This paper                 | N/A                                                                     |
| Probe primers of mouse <i>Glud1</i> :<br>Fwd: CATTGGCCTCCTTCTGCCT<br>Rev: GAGGTGCCATGAGAGGTGTC                                                                                                                                                                            | This paper                 | N/A                                                                     |
| Probe primers of mouse <i>Glud2</i> :<br>Fwd: GCCCTACCGTGATGTCTTT<br>Rev: GTCAATGTCCAGAGGGGTCA                                                                                                                                                                            | This paper                 | N/A                                                                     |
| Probe primers of mouse <i>Nrxn2<math>\alpha</math></i> :<br>Fwd: GCAGGGATTGGACACGCTAT<br>Rev: GAACTGTGACTGCCTACCCC                                                                                                                                                        | This paper                 | N/A                                                                     |
| Probe template for <i>Nrxn2<math>\beta</math></i> :<br>TGAGGGGGGACCCCTAGCCGCCCGC<br>GATGGATCCAGGCTTACGGACCTT<br>GGCCTTCCCGCTGCGGTACCCCGG<br>ATTCCCCGGCGGATCCAGTTGATT<br>GCTTGGCTCCGGACTGAGGCTCGGG<br>CTCTGGTTTTCTTCGCTTACCCCTA<br>CCCCCTCTCGGAGCTCGCAACCGG<br>AGGGGGGCTTT | This paper                 | N/A                                                                     |
| Mouse genotyping primers for mouse <i>Cbln1</i> loxp site 1:<br>Fwd:<br>ACGCGGGGACATTTGTTCTGGAGT<br>Rev:<br>ACGATGGGCTCTGTCTCATTCTGC                                                                                                                                      | This paper                 | N/A                                                                     |
| Mouse genotyping primers for mouse <i>Cbln1</i> loxp site 2:<br>Fwd: AGAAAGGCGACCGAGCATAC<br>Rev: AGTGTGCAGAGCTAAGCGAA                                                                                                                                                    | This paper                 | N/A                                                                     |
| <b>Software and Algorithms</b>                                                                                                                                                                                                                                            |                            |                                                                         |
| GraphPad Prism 7.0                                                                                                                                                                                                                                                        | GraphPad                   | <a href="https://www.graphpad.com">https://www.graphpad.com</a> , RRID: |

---

|        |     |                                                                                                        |
|--------|-----|--------------------------------------------------------------------------------------------------------|
| ImageJ | NIH | SCR_002798<br><a href="https://imagej.nih.gov/ij/">https://imagej.nih.gov/ij/</a> ,<br>RRID:SCR_002285 |
|--------|-----|--------------------------------------------------------------------------------------------------------|

---

340

341 **Animals**

342 Generation of *Cbln1* conditional knockout (cKO) mice was performed following procedures described  
343 previously (**Zhuang et al. 2019**), with the whole coding sequence as the targeted region (*Figure 2—*  
344 *figure supplement 1A*). *Cbln1*<sup>fl/+</sup> mice and corresponding *Cre* mice lines were used to generate *Cbln1*  
345 cKO and littermate control embryos. Genotyping primers are as following: the first *Cbln1-loxP* site, 5'-  
346 ACGCGGGGACATTTGTTCTGGAGT-3' and 5'-ACGATGGGCTCTGTCTCATTCTGC-3'; the second *Cbln1-*  
347 *loxP* site, 5'-AGAAAGGCGACCGAGCATAC-3' and 5'-AGTGTGCAGAGCTAAGCGAA-3'. *Wnt1-cre*  
348 (**Danielian et al. 1998**), *Rosa26mTmG* (**Muzumdar et al. 2007**), *Gli2*<sup>+/-</sup> (**Bai and Joyner 2001**), *Foxa2-*  
349 *cre*<sup>ERT</sup> (**Park et al. 2008**), and *Nes-cre* (**Tronche et al. 1999**) mice used in this study were described in  
350 the indicated references and their stock numbers in The Jackson Laboratory are 003829, 007676,  
351 007922, 008464, and 003771 respectively. All mice were housed in a specific pathogen-free animal  
352 facility at the Laboratory Animal Center of Southern University of Science and Technology. All  
353 experiments using mice were carried out following animal protocols approved by the Laboratory  
354 Animal Welfare and Ethics Committee of Southern University of Science and Technology. For timed  
355 pregnancy, embryos were identified as E0.5 when a copulatory plug was observed at noon. To induce  
356 *Cre* activity for *Foxa2-cre*<sup>ERT</sup>-derived *Cbln1* cKO in floor plate, 8 mg tamoxifen (Cayman Chemical) was  
357 given orally to E8.5 pregnant mice with an animal gauge feeding needle. Fertilized chick eggs were  
358 purchased from a local supplier and chick embryos developed in an incubator (BSS 420, Grumbach)  
359 were staged using the Hamburger and Hamilton staging system. For all experiments with mice or  
360 chick, a minimum of three (up to 20) embryos or pups was analyzed for each genotype or  
361 experimental condition.

362

363 **In ovo electroporation**

364 The chick spinal DCN-specific knockdown vector pMath1-eGFP-miRNA was a gift from Esther T.  
365 Stoeckli (*Wilson and Stoeckli 2013*). DCN-specific overexpression vector pMath1-eGFP-IRES-MCS was  
366 constructed by replacing the miRNA cassette with an IRES sequence plus multiple cloning sites (MCS).  
367 The coding sequence of chick *Cbln1* was cloned from St. 23/24 chick spinal cord cDNA with primers  
368 5'-ATGCGGGGCCCG-3' and 5'-TTAAAGCGGGAACACC-3'. *In ovo* electroporation was carried out using  
369 the ECM<sup>®</sup> 830 Square Wave Electroporator (BTX) as previously described (*Ji et al. 2009*).  
370 Electroporation was performed at St.17 and embryos were collected and analyzed at St.23.

371

### 372 **Tissue and neuron culture**

373 All tissue culture reagents were from Thermo unless otherwise specified. DCN explant and neuronal  
374 culture were carried out as describe previously (*Zhuang et al. 2019*). The working concentration for  
375 recombinant human Cbln1 (R&D Systems) was 500 ng/ml. GPN (Abcam) was dissolved in DMSO and  
376 used at the working concentration of 50 µM. P6-P8 mouse cerebella were cut into small pieces with  
377 scissors after the meninges were carefully removed. The tissue was then digested in 5 ml HBSS  
378 containing 0.1% Trypsin and 0.04% DNase I in a 37 °C water bath for 15 min before termination  
379 addition of 5 ml BME with 10% FBS. Cell suspension was obtained by filtering with sterile cell  
380 strainers (40 µm). After centrifuged at 200×g for 5 min, the cell pellets were resuspended in BME  
381 supplemented with 5% FBS, 1× GlutaMAX-1, 0.5% glucose and 1× penicillin/streptomycin. The  
382 neurons were then plated in PDL-coated cell culture plate and the medium was replaced by  
383 maintenance medium supplemented with 1× B27, 1× GlutaMAX-1, 0.5% glucose and 1×  
384 penicillin/streptomycin after 4 h.

385

### 386 **Knockdown or overexpression using lentiviral system, RT-qPCR, and Western blotting**

387 The lentiviral knockdown constructs were made using pLKO.1-Puro or pLKO.1-GFP plasmids  
388 (Addgene) (*Zhuang et al. 2019*). The target sequences of shRNA are as following: *shCbln1*, 5'-  
389 GGCTGGAAGTACTCAACCTTC-3'; *shNrxn2*, 5'-CGTTCGTTTATTTCCCTCGAT-3'; *shNrxn2α*, 5'-

390 GGACTTCTGCTGTTCAACTCA-3'; *shNrxn2β*, 5'-CTCCCCATCACCCGGATTTG-3'; *shCtrl* for pLKO.1-Puro  
391 system: 5'-GCATCAAGGTGAACTTCAAGA-3'; *shCtrl* for pLKO.1-GFP system: 5'-  
392 GCATAAACCCGCCACTCATCT-3'. RT-qPCR was performed as previously reported (**Zhuang et al. 2019**).  
393 Primers used in qPCR are as following: *mCbln1*, 5'-CCGAGATGAGTAATCGCACCA-3' and 5'-  
394 TCAACATGAGGCTCACCTGGATG-3'; *mNrxn2*, 5'-TACCCGGCAGGAACTTTGA-3' and 5'-  
395 CCCCTATCTTGATGGCAGC-3'; *mNrxn2α*, 5'-CTCAAGTCTGGGGCTGTCTG-3' and 5'-  
396 ATAGCGTGCCAATCCCTGC-3'; *mNrxn2β*, 5'-GATGGATCCAGGCTTCACGG-3' and 5'-  
397 GAAGGAAAACCAGAGCCCGA-3'; *mGapdh*: 5'-TTGTCAGCAATGCATCCTGCACCACC-3' and 5'-  
398 CTGAGTGGCAGTGATGGCATGGAC-3'.

399 The coding sequence of mouse *Cbln1* was cloned from E11.5 mouse spinal cord cDNA with  
400 primers 5'-CCGGAGGCGCGATGCT-3' and 5'-ATCCCGATACGTGCCAG-3', and lenti viral expression  
401 construct was constructed using the pHBLV-CMV-MCS-3×Flag-EF1-ZsGreen1-T2A-Puro backbone  
402 (Hanbio). After infection with the lenti virus, the COS7 cell line stably expressing *Cbln1* was acquired  
403 after multiple rounds of selection using puromycin. Expression of *Cbln1*-FLAG in cell pellets and  
404 supernatant was validated by Western Blotting (WB) following the standard protocols. The dilutions  
405 and sources of antibodies used in WB are as following: *Cbln1* (1:100, Abclonal), FLAG (1:1000,  
406 Beyotime), β-actin (1:10000, Abcam).

407

#### 408 **Identification of the differentially expressed genes in the dorsal spinal cord of mouse embryos**

409 *Wnt1-cre* and *Rosa26mTmG* mice were mated to generate *Wnt1-Cre,Rosa26mTmG* embryos. E10.5,  
410 E11.5 and E12.5 embryos were collected and dissected, and dorsal spinal cords were dissociated and  
411 GFP<sup>+</sup> neurons were purified using FACS. RNAs were prepared from these purified neurons and the  
412 expression profiling was carried out using microarray analysis with GeneChip<sup>®</sup> Mouse Exon 1.0 ST  
413 Array (Affymetrix) following the manufacturer's manual.

414

#### 415 **In situ hybridization**

416 *In situ* hybridization using DIG-labeled RNA probes was carried out on sections from mouse or chick  
417 tissue sections following a previously reported protocol (**Ji and Jaffrey 2012**). The primers used for  
418 PCR in cloning the templates for generating RNA probes are as following (all mouse clones except  
419 indicated): *Cbln1*, 5'-CCAAGACGTGACACGCGAGG-3' and 5'-CAGTAAGTGGCAGGGTTCAG-3'; chick  
420 *Cbln1*, 5'-GAGAAGACGCCGCTCAGGTGT-3' and 5'-CGGGTTGATTTGCGGTCCTTC-3'; *Nrxn1*, 5'-  
421 CAGGGAATGCGATCAGGAGG-3' and 5'-AGACTTCTTCTCTGGCACGC-3'; *Nrxn2*, 5'-  
422 TCACAGCCCTGGGTTGATTT-3' and 5'-AGCAGCGACACACACAAAAG-3'; *Nrxn3*, 5'-  
423 GTGAGATGGGGTGTACCACG-3' and 5'-ACACACACTGGTCAGAACC-3'; *GluD1*, 5'-  
424 CATTGGCCTCCTTCTGCCT-3' and 5'-GAGGTGCCATGAGAGGTGTC-3'; *GluD2*, 5'-  
425 GCCCCTACCGTGATGTCTTT-3' and 5'-GTCAATGTCCAGAGGGGTCA-3'; *Nrxn2 $\alpha$* , 5'-  
426 GCAGGGATTGGACACGCTAT-3' and 5'-GAACTGTGACTGCCTACCCC-3'. The template for *Nrxn2 $\beta$* -  
427 specific RNA probe was synthesized (5'-TGAGGGGGGACCCCTAGCCGCCCGGATGGATCCAGGCTTCA  
428 CGGACCTTGGCCTTCCCGCTGCGGTACCCCGGATTCCCGGCGGGATCCAGTTGATTTGCTTGCTCCGGACT  
429 GAGGCTCGGGCTCTGGTTTTCTTCGCTTCACCCCTACCCCTCTCGGAGCTCGCAACCGGAGGGGGGCTTT-  
430 3') and cloned to pUC57 (Sangon). RNA probes were transcribed *in vitro* using DIG RNA Labeling Kit  
431 (SP6/T7) (Roche). Anti-Digoxigenin-AP and NBT/BCIP Stock Solution were also from Roche. *In situ*  
432 hybridization images were collected with Axio Imager A2 (Zeiss) or TissueFAXS Cytometer  
433 (TissueGnostics).

434

#### 435 **Axon guidance assay using co-culture of COS7 cell aggregates with DCN or retinal explants**

436 Aggregates of COS7 cells stably expressing Cbln1 were prepared by resuspending cells in rat tail  
437 collagen gel and then placed into 24-well glass bottom plates (Nest). DCN explants were dissected  
438 from E11 mouse embryos, immersed in collagen gel and placed 200-400  $\mu$ m away from the COS7  
439 aggregates. Explants and cell aggregates were co-cultured for 40-48 h in neurobasal medium  
440 supplemented with B27, GlutaMAX-1 and penicillin/streptomycin. Similarly, retinal explants were  
441 dissected from E14.5 mouse retinas and co-cultured with COS7 aggregates for around 30 h, with the

442 culture medium as following: Neurobasal medium mixed with DMEM/F12 (1:1), supplemented with  
443 B27, N21 MAX Media Supplement, GlutaMAX-1 and penicillin/streptomycin.

444

#### 445 **Dil tracing of axons**

446 Dil tracing of commissural axons in the spinal cord was performed as previously reported (*Zhuang et*  
447 *al. 2019*). Dil labeling of cerebellar parallel fibers was performed as previously described (*Yamasaki*  
448 *et al. 2001*). Dil tracing of optic nerves was performed as previously reported (*Peng et al. 2018*).

449

#### 450 **CTB labelling of optic nerve**

451 To label RGC axon terminals in P4 mouse brain, RGC axons were anterogradely labeled by CTB  
452 (Cholera Toxin Subunit B) conjugated with Alexa Fluor™ 555 (Invitrogen, C34776) through intravitreal  
453 injection 48 hr before sacrifice. After PFA perfusion, the brains were fixed with 4% PFA in 0.1 M PB  
454 overnight, dehydrated with 15% sucrose and 30% sucrose in 0.1 M PB overnight at 4°C sequentially,  
455 embedded with O.C.T. for coronal section, and cryosectioned at 12 µm with Leica CM1950 Cryostat.  
456 The images were captured on Tissue Genostics with identical settings for each group in the same  
457 experiment with the TissueFAXS 7.0 software.

458

#### 459 **Immunostaining and immunofluorescence**

460 Immunostaining of tissue sections and immunofluorescence (IF) of cultured DCN explants and  
461 neurons were done as previously described (*Zhuang et al. 2019*). The spinal cord open-books were  
462 prepared similarly as Dil tracing, and their immunostaining was performed with similar procedures as  
463 tissues sections except that all incubation and washing were done in 24-well plates and the open-  
464 books were mounted onto slides and covered with cover slips before confocal imaging. For IF of  
465 axon surface Cbln1 in cultured DCN neurons after GPN treatment, the permeabilization step was  
466 omitted and there was no Triton x-100 in antibody incubation buffers. Immunostaining of tissue  
467 sections from the cerebellum and the optic chiasm were done as previously described (*Hirai et al.*

468 **2005; Peng et al. 2018).** The dilutions and sources of antibodies used in immunostaining and  
469 immunofluorescence are as following: Cbln1 (1:1000, Abcam), Cbln1 (1:50, Frontier Institute), Lhx2  
470 (1:500, Abcam), Alcam (1:200, R&D Systems), Lhx9 (1:50, Santa Cruz Biotechnology), Robo3 (1:500,  
471 R&D Systems), Tag1 (1:200, R&D Systems), NFM (1:1000, Cell Signaling Technology), GFP (1:1000,  
472 Abcam), Isl1/2 (1:500, DSHB), Nrnx2 (1:200, Abcam), Calbindin (1:200, Swant), NeuN (1:500, Cell  
473 Signaling Technology), Brn3a (1:200, Millipore). Alexa Fluor-conjugated secondary antibodies  
474 (Thermo) were used at 1:1000 (555) or 1:500 (488). Fluorescent images were acquired using laser-  
475 scanning confocal microscopes Nikon A1R with NIS software, Leica SP8 with LASX software, or Zeiss  
476 LSM 800 with Zen software. All images were collected with identical settings for each group in the  
477 same experiment. Quantification of immunofluorescence signals was performed using ImageJ.

478

#### 479 **Statistical analysis**

480 Statistical analysis was performed with GraphPad Prism 7.0. Most of our data are represented as the  
481 box and whisker plots unless otherwise specified in the figure legends, and the settings are: 25–75  
482 percentiles (boxes), minimum and maximum (whiskers), and medians (horizontal lines). Unpaired  
483 Student's t test was performed for comparison between two groups and ANOVA with Tukey's  
484 multiple comparison test was performed to the comparison of three or more groups. \* indicates  
485 statistically significant: \* $p < 0.05$ , \*\* $p < 0.01$ , \*\*\* $p < 0.001$ , \*\*\*\* $p < 0.0001$ .

486

#### 487 **Acknowledgements**

488 We thank Esther T. Stoeckli for the pMath1-eGFP-miRNA vector, members of Ji and Jaffrey  
489 laboratories for help, technical support, and comments on the manuscript. This work was supported  
490 by National Natural Science Foundation of China (31871038 and 32170955 to S.-J.J.), Shenzhen-Hong  
491 Kong Institute of Brain Science-Shenzhen Fundamental Research Institutions (2021SHIBS0002,  
492 2019SHIBS0002), High-Level University Construction Fund for Department of Biology (internal grant

493 no. G02226301), Science and Technology Innovation Commission of Shenzhen Municipal  
494 Government (ZDSYS20200811144002008), and NIH (R35NS111631 to S.R.J.).

495

#### 496 **Author contributions**

497 S.-J.J. and S.R.J. conceived the project and designed experiments; S.-J.J. performed screening and  
498 identification of DEGs in DCNs; P.H. and Y.S. performed and analyzed most of the experiments with  
499 help of Z.Y., M.Z. and Q.W.; X.L., C.Y., and J.Z. performed experiments using chick embryos; S.-J.J.,  
500 S.R.J., and P.H. wrote the manuscript with editing and input from other authors.

501

#### 502 **Ethics**

503 All experiments using mice were carried out following the animal protocols approved by the  
504 Laboratory Animal Welfare and Ethics Committee of Southern University of Science and Technology  
505 (approval numbers: SUSTC-JY2017004, SUSTech-JY202102081).

506

#### 507 **Competing interests**

508 The authors have declared that no competing interests exist.

509

#### 510 **Data availability statement**

511 The microarray data has been deposited to the Gene Expression Omnibus (GEO) with accession  
512 number GSE169448.

513

#### 514 **References**

515 Augsburger A, Schuchardt A, Hoskins S, Dodd J, Butler S. 1999. BMPs as mediators of roof plate  
516 repulsion of commissural neurons. *Neuron* **24**:127-141. [PMID: 10677032](#)  
517 Bai CB, Joyner AL. 2001. Gli1 can rescue the in vivo function of Gli2. *Development* **128**:5161-5172.  
518 [PMID: 11748151](#)  
519 Biederer T, Sudhof TC. 2001. CASK and protein 4.1 support F-actin nucleation on neurexins. *J Biol*  
520 *Chem* **276**:47869-47876. DOI: <https://doi.org/10.1074/jbc.M105287200>, [PMID: 11604393](#)



- 521 Biederer T, Südhof TC. 2000. Mints as adaptors. Direct binding to neurexins and recruitment of  
522 munc18. *J Biol Chem* **275**:39803-39806. DOI: <https://doi.org/10.1074/jbc.C000656200>, PMID:  
523 [11036064](https://pubmed.ncbi.nlm.nih.gov/11036064/)
- 524 Brose K, Bland KS, Wang KH, Arnott D, Henzel W, Goodman CS, Tessier-Lavigne M, Kidd T. 1999. Slit  
525 proteins bind Robo receptors and have an evolutionarily conserved role in repulsive axon  
526 guidance. *Cell* **96**:795-806. PMID: [10102268](https://pubmed.ncbi.nlm.nih.gov/10102268/)
- 527 Butler SJ, Dodd J. 2003. A role for BMP heterodimers in roof plate-mediated repulsion of  
528 commissural axons. *Neuron* **38**:389-401. PMID: [12741987](https://pubmed.ncbi.nlm.nih.gov/12741987/)
- 529 Cerrato V, Mercurio S, Leto K, Fucà E, Hoxha E, Bottes S, Pagin M, Milanese M, Ngan CY, Concina G,  
530 Ottolenghi S, Wei CL, Bonanno G, Pavesi G, Tempia F, Buffo A, Nicolis SK. 2018. Sox2 conditional  
531 mutation in mouse causes ataxic symptoms, cerebellar vermis hypoplasia, and postnatal defects  
532 of Bergmann glia. *Glia* **66**:1929-1946. DOI: <https://doi.org/10.1002/glia.23448>, PMID: [29732603](https://pubmed.ncbi.nlm.nih.gov/29732603/)
- 533 Charron F, Stein E, Jeong J, McMahon AP, Tessier-Lavigne M. 2003. The morphogen sonic hedgehog  
534 is an axonal chemoattractant that collaborates with netrin-1 in midline axon guidance. *Cell*  
535 **113**:11-23. PMID: [12679031](https://pubmed.ncbi.nlm.nih.gov/12679031/)
- 536 Chen Z, Gore BB, Long H, Ma L, Tessier-Lavigne M. 2008. Alternative splicing of the Robo3 axon  
537 guidance receptor governs the midline switch from attraction to repulsion. *Neuron* **58**:325-332.  
538 DOI: <https://doi.org/10.1016/j.neuron.2008.02.016>, PMID: [18466743](https://pubmed.ncbi.nlm.nih.gov/18466743/)
- 539 Colak D, Ji SJ, Porse BT, Jaffrey SR. 2013. Regulation of axon guidance by compartmentalized  
540 nonsense-mediated mRNA decay. *Cell* **153**:1252-1265. DOI:  
541 <https://doi.org/10.1016/j.cell.2013.04.056>, PMID: [23746841](https://pubmed.ncbi.nlm.nih.gov/23746841/)
- 542 Danielian PS, Muccino D, Rowitch DH, Michael SK, McMahon AP. 1998. Modification of gene activity  
543 in mouse embryos in utero by a tamoxifen-inducible form of Cre recombinase. *Curr Biol* **8**:1323-  
544 1326. PMID: [9843687](https://pubmed.ncbi.nlm.nih.gov/9843687/)
- 545 Fossati M, Assendorp N, Gemin O, Colasse S, Dingli F, Arras G, Loew D, Charrier C. 2019. Trans-  
546 Synaptic Signaling through the Glutamate Receptor Delta-1 Mediates Inhibitory Synapse  
547 Formation in Cortical Pyramidal Neurons. *Neuron* **104**:1081-1094 e1087. DOI:  
548 <https://doi.org/10.1016/j.neuron.2019.09.027>, PMID: [31704028](https://pubmed.ncbi.nlm.nih.gov/31704028/)
- 549 Harada H, Farhani N, Wang XF, Sugita S, Charish J, Attisano L, Moran M, Cloutier JF, Reber M,  
550 Bremner R, Monnier PP. 2019. Extracellular phosphorylation drives the formation of neuronal  
551 circuitry. *Nat Chem Biol* **15**:1035-1042. DOI: <https://doi.org/10.1038/s41589-019-0345-z>, PMID:  
552 [31451763](https://pubmed.ncbi.nlm.nih.gov/31451763/)
- 553 Hata Y, Butz S, Südhof TC. 1996. CASK: a novel dlg/PSD95 homolog with an N-terminal calmodulin-  
554 dependent protein kinase domain identified by interaction with neurexins. *J Neurosci* **16**:2488-  
555 2494. DOI: <https://doi.org/10.1523/jneurosci.16-08-02488.1996>, PMID: [8786425](https://pubmed.ncbi.nlm.nih.gov/8786425/)
- 556 Hernandez-Enriquez B, Wu Z, Martinez E, Olsen O, Kaprielian Z, Maness PF, Yoshida Y, Tessier-  
557 Lavigne M, Tran TS. 2015. Floor plate-derived neuropilin-2 functions as a secreted semaphorin  
558 sink to facilitate commissural axon midline crossing. *Genes Dev* **29**:2617-2632. DOI:  
559 <https://doi.org/10.1101/gad.268086.115>, PMID: [26680304](https://pubmed.ncbi.nlm.nih.gov/26680304/)
- 560 Hirai H, Pang Z, Bao D, Miyazaki T, Li L, Miura E, Parris J, Rong Y, Watanabe M, Yuzaki M, Morgan JI.  
561 2005. Cbln1 is essential for synaptic integrity and plasticity in the cerebellum. *Nat Neurosci*  
562 **8**:1534-1541. DOI: <https://doi.org/10.1038/nn1576>, PMID: [16234806](https://pubmed.ncbi.nlm.nih.gov/16234806/)
- 563 Iyata K, Kono M, Narumi S, Motohashi J, Kakegawa W, Kohda K, Yuzaki M. 2019. Activity-Dependent  
564 Secretion of Synaptic Organizer Cbln1 from Lysosomes in Granule Cell Axons. *Neuron* **102**:1184-  
565 1198.e1110. DOI: <https://doi.org/10.1016/j.neuron.2019.03.044>, PMID: [31072786](https://pubmed.ncbi.nlm.nih.gov/31072786/)
- 566 Islam SM, Shinmyo Y, Okafuji T, Su Y, Naser IB, Ahmed G, Zhang S, Chen S, Ohta K, Kiyonari H, Abe T,  
567 Tanaka S, Nishinakamura R, Terashima T, Kitamura T, Tanaka H. 2009. Draxin, a repulsive guidance  
568 protein for spinal cord and forebrain commissures. *Science* **323**:388-393. DOI:  
569 <https://doi.org/10.1126/science.1165187>, PMID: [19150847](https://pubmed.ncbi.nlm.nih.gov/19150847/)
- 570 Ito-Ishida A, Miyazaki T, Miura E, Matsuda K, Watanabe M, Yuzaki M, Okabe S. 2012. Presynaptically  
571 released Cbln1 induces dynamic axonal structural changes by interacting with GluD2 during

- 572 cerebellar synapse formation. *Neuron* **76**:549-564. DOI:  
573 <https://doi.org/10.1016/j.neuron.2012.07.027>, PMID: 23141067
- 574 Ji SJ, Jaffrey SR. 2012. Intra-axonal translation of SMAD1/5/8 mediates retrograde regulation of  
575 trigeminal ganglia subtype specification. *Neuron* **74**:95-107. DOI:  
576 <https://doi.org/10.1016/j.neuron.2012.02.022>, PMID: 22500633
- 577 Ji SJ, Periz G, Sockanathan S. 2009. Nolz1 is induced by retinoid signals and controls motoneuron  
578 subtype identity through distinct repressor activities. *Development* **136**:231-240. DOI:  
579 <https://doi.org/10.1242/dev.028043>, PMID: 19056829
- 580 Kidd T, Bland KS, Goodman CS. 1999. Slit is the midline repellent for the robo receptor in *Drosophila*.  
581 *Cell* **96**:785-794. PMID: 10102267
- 582 Lyuksyutova AI, Lu CC, Milanesio N, King LA, Guo N, Wang Y, Nathans J, Tessier-Lavigne M, Zou Y.  
583 2003. Anterior-posterior guidance of commissural axons by Wnt-frizzled signaling. *Science*  
584 **302**:1984-1988. DOI: <https://doi.org/10.1126/science.1089610>, PMID: 14671310
- 585 Mains RE, Kiraly DD, Eipper-Mains JE, Ma XM, Eipper BA. 2011. Kalrn promoter usage and isoform  
586 expression respond to chronic cocaine exposure. *BMC neuroscience* **12**:20. DOI:  
587 <https://doi.org/10.1186/1471-2202-12-20>, PMID: 21329509
- 588 Mason C, Slavi N. 2020. Retinal Ganglion Cell Axon Wiring Establishing the Binocular Circuit. *Annu Rev*  
589 *Vis Sci*. DOI: <https://doi.org/10.1146/annurev-vision-091517-034306>, PMID: 32396770
- 590 Matsuda K, Miura E, Miyazaki T, Kakegawa W, Emi K, Narumi S, Fukazawa Y, Ito-Ishida A, Kondo T,  
591 Shigemoto R, Watanabe M, Yuzaki M. 2010. Cbln1 is a ligand for an orphan glutamate receptor  
592 delta2, a bidirectional synapse organizer. *Science* **328**:363-368. DOI:  
593 <https://doi.org/10.1126/science.1185152>, PMID: 20395510
- 594 McCormick LE, Gupton SL. 2020. Mechanistic advances in axon pathfinding. *Curr Opin Cell Biol* **63**:11-  
595 19. DOI: <https://doi.org/10.1016/j.ceb.2019.12.003>, PMID: 31927278
- 596 McCurdy EP, Chung KM, Benitez-Agosto CR, Hengst U. 2019. Promotion of Axon Growth by the  
597 Secreted End of a Transcription Factor. *Cell Rep* **29**:363-377.e365. DOI:  
598 <https://doi.org/10.1016/j.celrep.2019.08.101>, PMID: 31597097
- 599 Moreno-Bravo JA, Roig Puiggros S, Mehlen P, Chedotal A. 2019. Synergistic Activity of Floor-Plate-  
600 and Ventricular-Zone-Derived Netrin-1 in Spinal Cord Commissural Axon Guidance. *Neuron*  
601 **101**:625-634.e623. DOI: <https://doi.org/10.1016/j.neuron.2018.12.024>, PMID: 30661739
- 602 Muguruma K, Nishiyama A, Ono Y, Miyawaki H, Mizuhara E, Hori S, Kakizuka A, Obata K, Yanagawa Y,  
603 Hirano T, Sasai Y. 2010. Ontogeny-recapitulating generation and tissue integration of ES cell-  
604 derived Purkinje cells. *Nat Neurosci* **13**:1171-1180. DOI: <https://doi.org/10.1038/nn.2638>, PMID:  
605 20835252
- 606 Mukherjee K, Sharma M, Urlaub H, Bourenkov GP, Jahn R, Südhof TC, Wahl MC. 2008. CASK  
607 Functions as a Mg<sup>2+</sup>-independent neurexin kinase. *Cell* **133**:328-339. DOI:  
608 <https://doi.org/10.1016/j.cell.2008.02.036>, PMID: 18423203
- 609 Muzumdar MD, Tasic B, Miyamichi K, Li L, Luo L. 2007. A global double-fluorescent Cre reporter  
610 mouse. *Genesis* **45**:593-605. DOI: <https://doi.org/10.1002/dvg.20335>, PMID: 17868096
- 611 Nawabi H, Briancon-Marjollet A, Clark C, Sanyas I, Takamatsu H, Okuno T, Kumanogoh A, Bozon M,  
612 Takeshima K, Yoshida Y, Moret F, Abouzid K, Castellani V. 2010. A midline switch of receptor  
613 processing regulates commissural axon guidance in vertebrates. *Genes Dev* **24**:396-410. DOI:  
614 <https://doi.org/10.1101/gad.542510>, PMID: 20159958
- 615 Okada A, Charron F, Morin S, Shin DS, Wong K, Fabre PJ, Tessier-Lavigne M, McConnell SK. 2006. Boc  
616 is a receptor for sonic hedgehog in the guidance of commissural axons. *Nature* **444**:369-373. DOI:  
617 <https://doi.org/10.1038/nature05246>, PMID: 17086203
- 618 Padamsey Z, McGuinness L, Bardo SJ, Reinhart M, Tong R, Hedegaard A, Hart ML, Emptage NJ. 2017.  
619 Activity-Dependent Exocytosis of Lysosomes Regulates the Structural Plasticity of Dendritic Spines.  
620 *Neuron* **93**:132-146. DOI: <https://doi.org/10.1016/j.neuron.2016.11.013>, PMID: 27989455
- 621 Paixao S, Balijepalli A, Serradj N, Niu J, Luo W, Martin JH, Klein R. 2013. EphrinB3/EphA4-mediated  
622 guidance of ascending and descending spinal tracts. *Neuron* **80**:1407-1420. DOI:  
623 <https://doi.org/10.1016/j.neuron.2013.10.006>, PMID: 24360544

- 624 Park EJ, Sun X, Nichol P, Saijoh Y, Martin JF, Moon AM. 2008. System for tamoxifen-inducible  
625 expression of cre-recombinase from the Foxa2 locus in mice. *Dev Dyn* **237**:447-453. DOI:  
626 <https://doi.org/10.1002/dvdy.21415>, PMID: 18161057
- 627 Peng J, Fabre PJ, Dolique T, Swikert SM, Kermasson L, Shimogori T, Charron F. 2018. Sonic Hedgehog  
628 Is a Remotely Produced Cue that Controls Axon Guidance Trans-axonally at a Midline Choice Point.  
629 *Neuron* **97**:326-340 e324. DOI: <https://doi.org/10.1016/j.neuron.2017.12.028>, PMID: 29346753
- 630 Reissner C, Runkel F, Missler M. 2013. Neurexins. *Genome Biol* **14**:213. DOI:  
631 <https://doi.org/10.1186/gb-2013-14-9-213>, PMID: 24083347
- 632 Sabatier C, Plump AS, Le M, Brose K, Tamada A, Murakami F, Lee EY, Tessier-Lavigne M. 2004. The  
633 divergent Robo family protein rig-1/Robo3 is a negative regulator of slit responsiveness required  
634 for midline crossing by commissural axons. *Cell* **117**:157-169. PMID: 15084255
- 635 Stoeckli ET. 2018. Understanding axon guidance: are we nearly there yet? *Development* **145**. DOI:  
636 <https://doi.org/10.1242/dev.151415>, PMID: 29759980
- 637 Stoeckli ET, Kuhn TB, Duc CO, Ruegg MA, Sonderegger P. 1991. The axonally secreted protein axonin-  
638 1 is a potent substratum for neurite growth. *The Journal of cell biology* **112**:449-455. DOI:  
639 <https://doi.org/10.1083/jcb.112.3.449>, PMID: 1991792
- 640 Sudhof TC. 2017. Synaptic Neurexin Complexes: A Molecular Code for the Logic of Neural Circuits.  
641 *Cell* **171**:745-769. DOI: <https://doi.org/10.1016/j.cell.2017.10.024>, PMID: 29100073
- 642 Suzuki K, Elegheert J, Song I, Sasakura H, Senkov O, Matsuda K, Kakegawa W, Clayton AJ, Chang VT,  
643 Ferrer-Ferrer M, Miura E, Kaushik R, Ikeno M, Morioka Y, Takeuchi Y, Shimada T, Otsuka S,  
644 Stoyanov S, Watanabe M, Takeuchi K, Dityatev A, Aricescu AR, Yuzaki M. 2020. A synthetic  
645 synaptic organizer protein restores glutamatergic neuronal circuits. *Science* **369**. DOI:  
646 <https://doi.org/10.1126/science.abb4853>, PMID: 32855309
- 647 Takeo YH, Shuster SA, Jiang L, Hu MC, Luginbuhl DJ, Rüllicke T, Contreras X, Hippenmeyer S, Wagner  
648 MJ, Ganguli S, Luo L. 2020. GluD2- and Cbln1-mediated competitive interactions shape the  
649 dendritic arbors of cerebellar Purkinje cells. *Neuron*. DOI:  
650 <https://doi.org/10.1016/j.neuron.2020.11.028>, PMID: 33352118
- 651 Tronche F, Kellendonk C, Kretz O, Gass P, Anlag K, Orban PC, Bock R, Klein R, Schutz G. 1999.  
652 Disruption of the glucocorticoid receptor gene in the nervous system results in reduced anxiety.  
653 *Nat Genet* **23**:99-103. DOI: <https://doi.org/10.1038/12703>, PMID: 10471508
- 654 Uemura T, Lee SJ, Yasumura M, Takeuchi T, Yoshida T, Ra M, Taguchi R, Sakimura K, Mishina M. 2010.  
655 Trans-synaptic interaction of GluRdelta2 and Neurexin through Cbln1 mediates synapse formation  
656 in the cerebellum. *Cell* **141**:1068-1079. DOI: <https://doi.org/10.1016/j.cell.2010.04.035>, PMID:  
657 20537373
- 658 Wilson NH, Stoeckli ET. 2013. Sonic hedgehog regulates its own receptor on postcrossing  
659 commissural axons in a glypican1-dependent manner. *Neuron* **79**:478-491. DOI:  
660 <https://doi.org/10.1016/j.neuron.2013.05.025>, PMID: 23931997
- 661 Wilson SI, Shafer B, Lee KJ, Dodd J. 2008. A molecular program for contralateral trajectory: Rig-1  
662 control by LIM homeodomain transcription factors. *Neuron* **59**:413-424. DOI:  
663 <https://doi.org/10.1016/j.neuron.2008.07.020>, PMID: 18701067
- 664 Wu Z, Makihara S, Yam PT, Teo S, Renier N, Balekoglu N, Moreno-Bravo JA, Olsen O, Chedotal A,  
665 Charron F, Tessier-Lavigne M. 2019. Long-Range Guidance of Spinal Commissural Axons by  
666 Netrin1 and Sonic Hedgehog from Midline Floor Plate Cells. *Neuron* **101**:635-647.e634. DOI:  
667 <https://doi.org/10.1016/j.neuron.2018.12.025>, PMID: 30661738
- 668 Yamasaki T, Kawaji K, Ono K, Bito H, Hirano T, Osumi N, Kengaku M. 2001. Pax6 regulates granule cell  
669 polarization during parallel fiber formation in the developing cerebellum. *Development* **128**:3133-  
670 3144. PMID: 11688562
- 671 Yasumura M, Yoshida T, Lee SJ, Uemura T, Joo JY, Mishina M. 2012. Glutamate receptor  $\delta 1$  induces  
672 preferentially inhibitory presynaptic differentiation of cortical neurons by interacting with  
673 neurexins through cerebellin precursor protein subtypes. *Journal of Neurochemistry* **121**:705-716.  
674 DOI: <https://doi.org/10.1111/j.1471-4159.2011.07631.x>, PMID: 22191730

675 Yu J, She Y, Yang L, Zhuang M, Han P, Liu J, Lin X, Wang N, Chen M, Jiang C, Zhang Y, Yuan Y, Ji SJ.  
676 2021. The m6A Readers YTHDF1 and YTHDF2 Synergistically Control Cerebellar Parallel Fiber  
677 Growth by Regulating Local Translation of the Key Wnt5a Signaling Components in Axons. *Adv Sci*.  
678 DOI: <https://doi.org/10.1002/advs.202101329>,  
679 Yuzaki M. 2018. Two Classes of Secreted Synaptic Organizers in the Central Nervous System. *Annu*  
680 *Rev Physiol* **80**:243-262. DOI: <https://doi.org/10.1146/annurev-physiol-021317-121322>, PMID:  
681 [29166241](https://pubmed.ncbi.nlm.nih.gov/29166241/)  
682 Zhuang M, Li X, Zhu J, Zhang J, Niu F, Liang F, Chen M, Li D, Han P, Ji SJ. 2019. The m6A reader  
683 YTHDF1 regulates axon guidance through translational control of Robo3.1 expression. *Nucleic*  
684 *acids research* **47**:4765-4777. DOI: <https://doi.org/10.1093/nar/gkz157>, PMID: [30843071](https://pubmed.ncbi.nlm.nih.gov/30843071/)  
685 Zou Y, Stoeckli E, Chen H, Tessier-Lavigne M. 2000. Squeezing axons out of the gray matter: a role for  
686 slit and semaphorin proteins from midline and ventral spinal cord. *Cell* **102**:363-375. PMID:  
687 [10975526](https://pubmed.ncbi.nlm.nih.gov/10975526/)  
688  
689

690 **Figures, figure legends, and supplementary files**

691

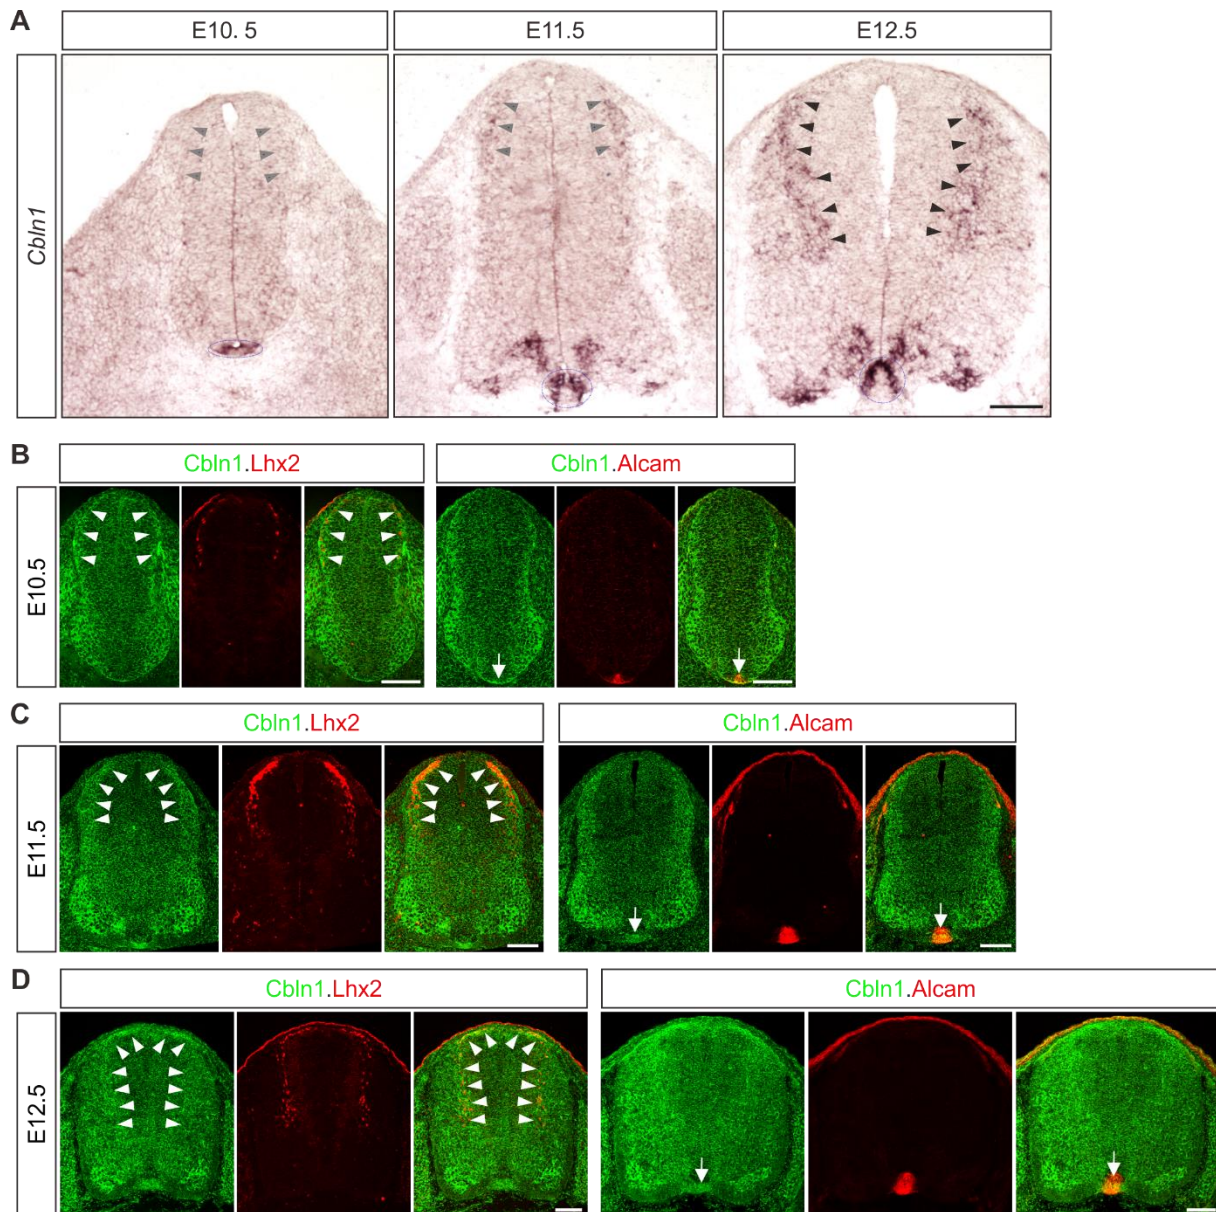

692

693 **Figure 1. Expression patterns of *Cbln1* and *Cbln1* in the developing mouse spinal cord.**

694 **(A)** *In situ* hybridization was carried out using a DIG-labelled RNA probe against *Cbln1* in spinal cord

695 cross-sections during E10.5~E12.5. Arrowheads and circled areas indicate the expression of *Cbln1* in

696 the dorsal commissural neurons (DCN) and the floor plate, respectively. Scale bar, 100  $\mu$ m.

697 **(B-D)** Co-immunostaining of *Cbln1* with Lhx2 or Alcam in spinal cord cross-sections during

698 E10.5~E12.5 showed expression of *Cbln1* in the dorsal commissural neurons and floor plate. White

699 arrowheads and arrows point to the expression of Cbln1 in the dorsal commissural neurons and floor  
700 plate, respectively. Scale bars, 100  $\mu$ m.  
701

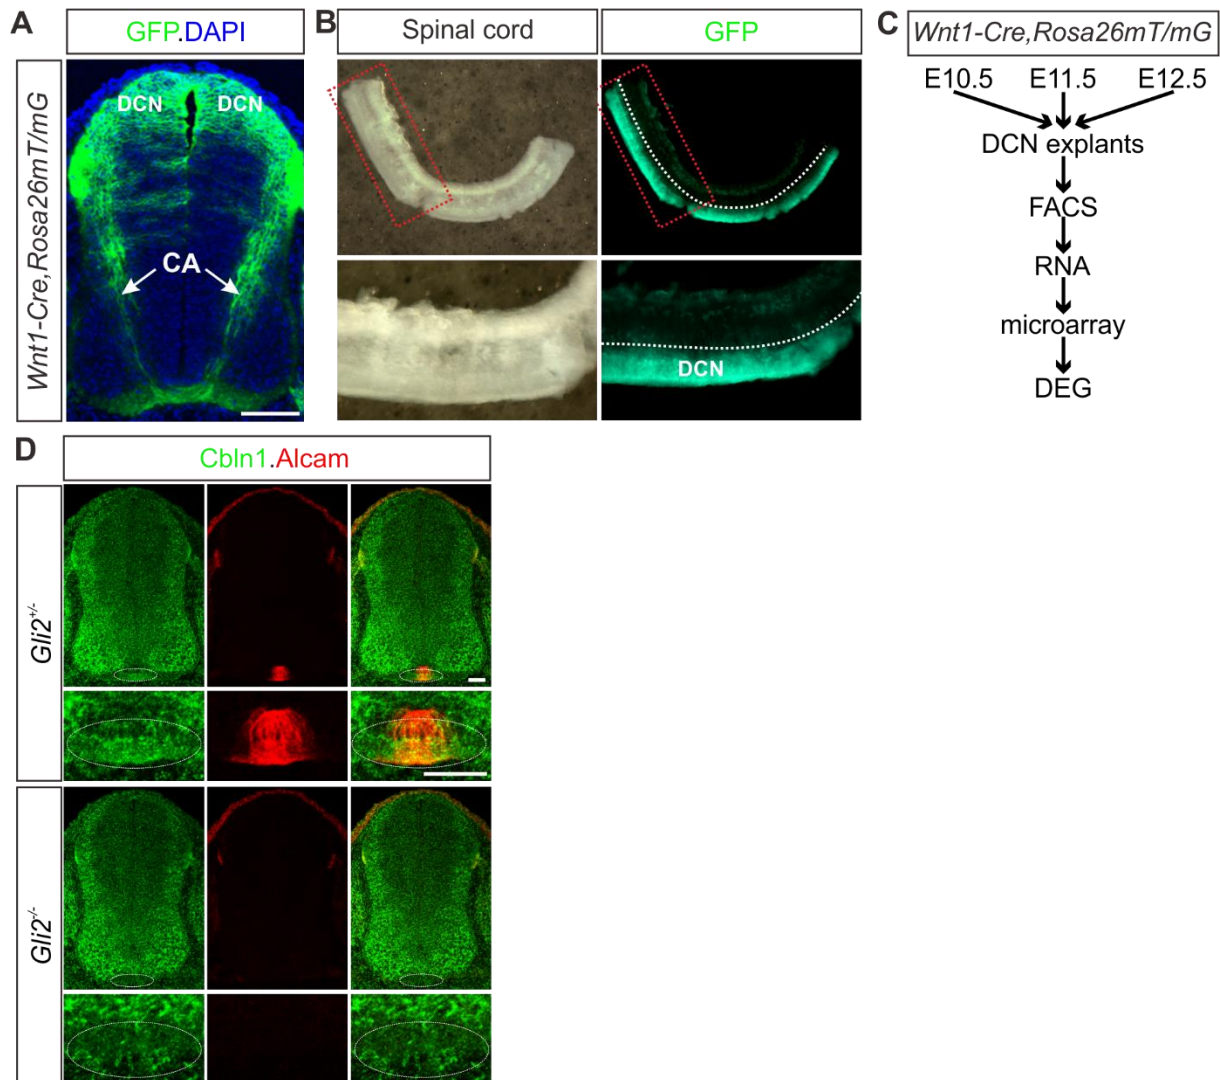

702

703 **Figure 1—figure supplement 1. Screening of the differentially expressed genes in the mouse**  
704 **embryonic dorsal spinal cord.**

705 **(A)** The embryonic dorsal spinal neurons were genetically labeled with eGFP by crossing *Wnt1-cre*  
706 with *Rosa26mT/mG* mice. Immunofluorescence of cross-sections of E11.5 spinal cord was shown. DCN,  
707 dorsal commissural neurons. CA, commissural axons. Scale bar, 100  $\mu$ m.

708 **(B)** The dissected E11.5 spinal cords were shown in both bright-field and fluorescent images. The  
 709 regions in the red dotted boxes were shown with higher magnification in the lower images. The  
 710 dotted white line indicates where to cut and separate dorsal and ventral spinal cord.  
 711 **(C)** The scheme showing the procedures for identifying the differentially expressed genes in the  
 712 mouse embryonic dorsal spinal cord.  
 713 **(D)** Co-immunostaining of Cbln1 with Alcam in spinal cord cross-sections of *Gli2* KO and its littermate  
 714 control embryos at E11.5. The circled areas indicate the expression and loss of Cbln1 in control and  
 715 *Gli2* KO embryos, respectively. Scale bar, 50  $\mu$ m.  
 716

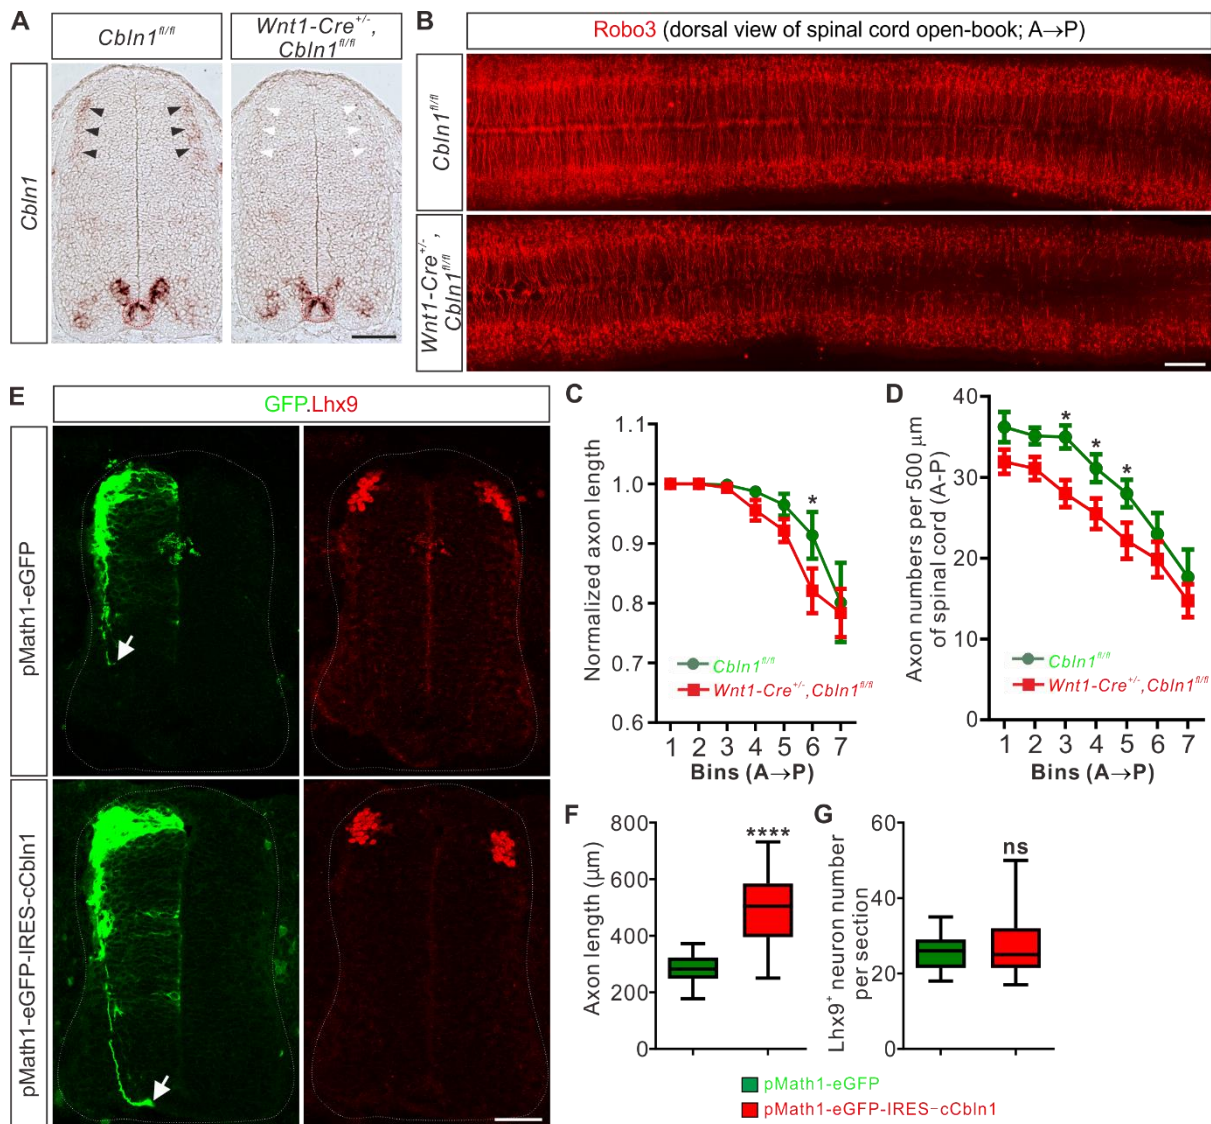

717

718 **Figure 2. Cell-autonomous Cbln1 is both required and sufficient to stimulate commissural axon**  
719 **growth *in vivo*.**

720 **(A)** Specific depletion of *Cbln1* in the dorsal spinal cord of *Wnt1-Cre<sup>+/-</sup>; Cbln1<sup>fl/fl</sup>* cKO mouse embryos.  
721 *In situ* hybridization of E11.5 spinal cord sections using RNA probes against *Cbln1* confirmed specific  
722 ablation of *Cbln1* from the dorsal commissural neurons (DCNs). Black arrowheads indicate *Cbln1*  
723 expression in control DCNs and white arrowheads highlight the missing *Cbln1* expression in cKO DCNs.  
724 Expression of *Cbln1* in floor plate (in red dotted circles) and other parts are not affected in DCN-  
725 specific *Cbln1* cKO spinal cords. Scale bar, 100  $\mu$ m.

726 **(B)** DCN-specific *Cbln1* cKO caused dramatic commissural axon growth defects *in vivo*. Commissural  
727 axons were marked by Robo3 by immunostaining in spinal cord open-books at E10.5. The lengths of  
728 commissural axons are much shorter and the numbers of commissural axons are much fewer in  
729 *Cbln1* cKO spinal cords compared with their littermate controls. Notice that these differences are  
730 more obvious in posterior ends of spinal cords. A, anterior; P, posterior. Scale bar, 200  $\mu$ m.

731 **(C, D)** Quantification of commissural axon numbers and lengths in **(B)**. The spinal cords were divided  
732 to bins (500  $\mu$ m) along the anterior-posterior (A $\rightarrow$ P) direction and the lengths and numbers of  
733 commissural axons in each bin were quantified. All data are mean  $\pm$  SEM: *Cbln1<sup>fl/fl</sup>* ( $n = 9$  embryos) vs  
734 *Wnt1-Cre<sup>+/-</sup>; Cbln1<sup>fl/fl</sup>* ( $n = 12$  embryos); \* $p = 0.014$  for Bin 6 in **(C)**; \* $p = 0.015$  for Bin 3 in **(D)**; \* $p =$   
735  $0.049$  for Bin 4 in **(D)**; \* $p = 0.041$  for Bin 5 in **(D)**; by unpaired Student's *t* test.

736 **(E)** Unilateral DCN-specific overexpression of *cCbln1* by *in ovo* electroporation of pMath1-eGFP-IRES-  
737 cCbln1 enhanced commissural axon growth in chick neural tubes. Lhx9 marks dl1 DCNs and eGFP  
738 marks electroporated DCNs and their axons. The arrows point commissural axon terminals. Shown  
739 are the representative images from 10 chick embryos with pMath1-eGFP-IRES-cCbln1 and 8 embryos  
740 with control plasmid.

741 **(F, G)** Quantification of commissural axon length and Lhx9<sup>+</sup> neuron numbers in **(E)**. All data are  
742 represented as box and whisker plots: for **(F)**, pMath1-eGFP-IRES-cCbln1 ( $n = 35$  sections) vs pMath1-



743 eGFP ( $n = 31$  sections), \*\*\*\* $p = 5.56E-12$ ; for (G), pMath1-eGFP-IRES-cCbln1 ( $n = 37$  sections) vs  
 744 pMath1-eGFP ( $n = 29$  sections),  $p = 0.32$ , ns, not significant; by unpaired Student's  $t$  test.  
 745

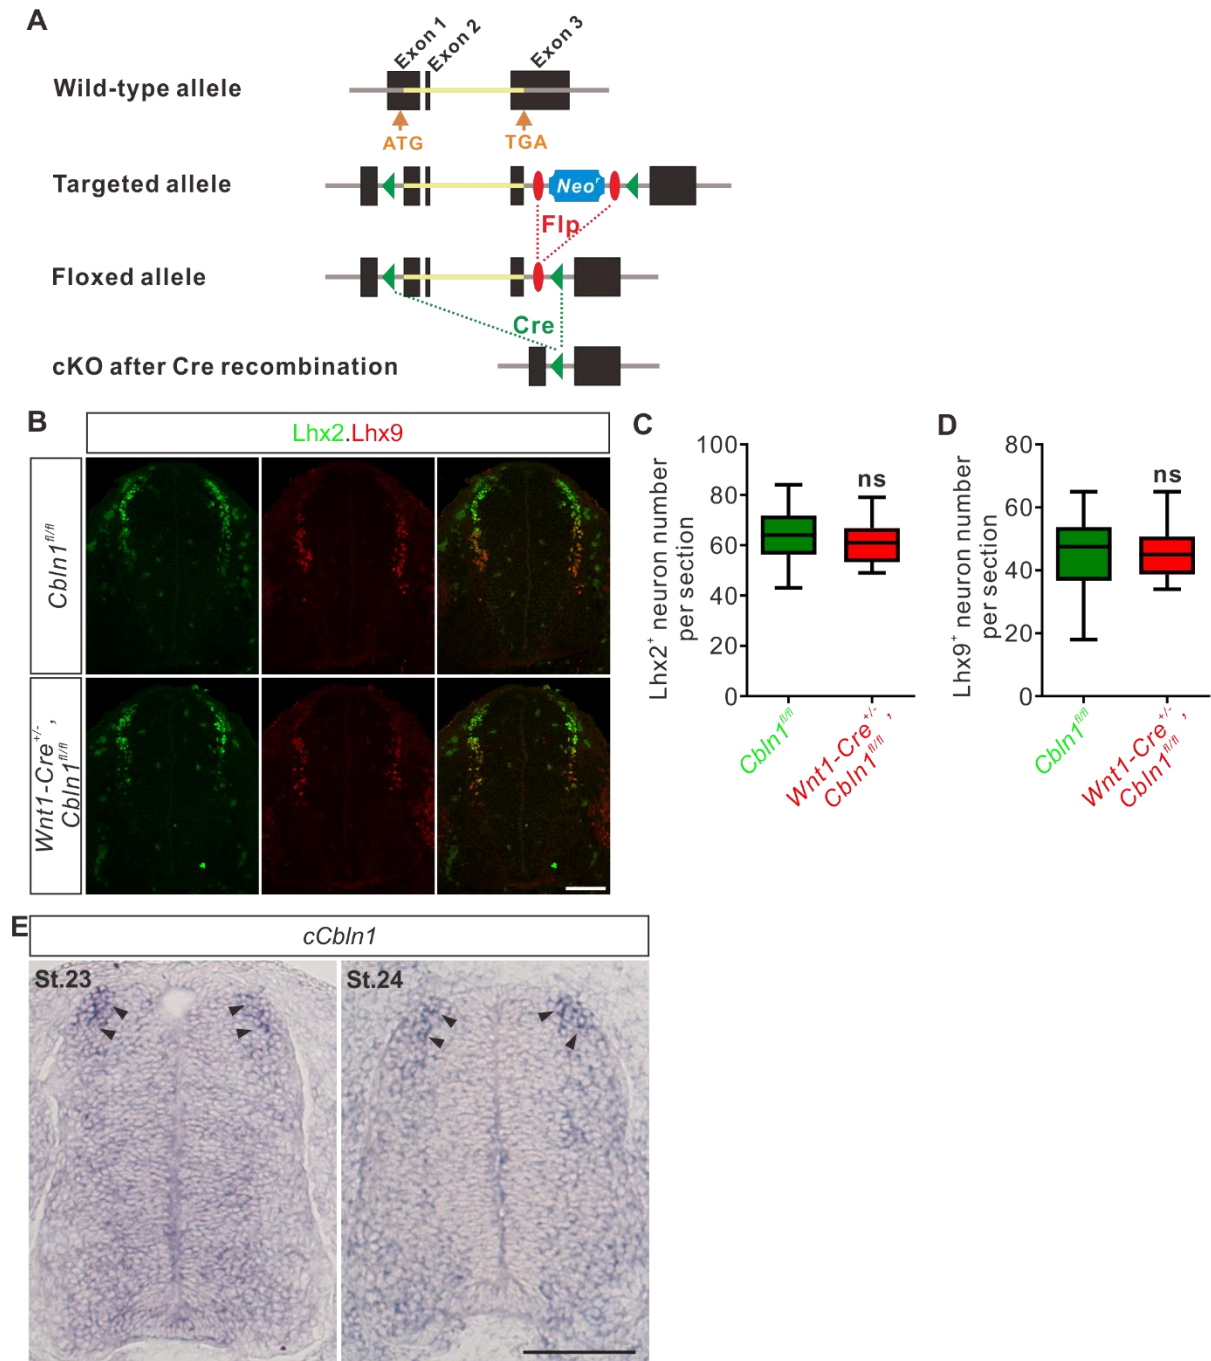

746  
 747 **Figure 2—figure supplement 1. DCN-specific cKO of *Cbln1* does not affect neurogenesis and**  
 748 **patterning of spinal DCNs.**

749 **(A)** Schematic drawings showing the generation of *Cbln1* cKO. The coding sequence of *Cbln1* is  
 750 deleted after Cre-mediated recombination.

751 **(B)** Lhx2 and Lhx9 immunostaining in E11.5 spinal cord indicated that *Cbln1* cKO in DCNs does not  
 752 disturb neurogenesis and patterning of spinal DCNs. Scale bar, 100  $\mu\text{m}$ .  
 753 **(C, D)** Quantification of Lhx2<sup>+</sup> and Lhx9<sup>+</sup> neurons in **(B)** showed that their neurogenesis or patterning  
 754 is not affected in *Cbln1* cKO. All data are represented as box and whisker plots: *Cbln1*<sup>fl/fl</sup> (*n* = 20  
 755 sections) vs *Wnt1-Cre*<sup>+/-</sup>, *Cbln1*<sup>fl/fl</sup> (*n* = 16 sections); ns, not significant; *p* = 0.46 for Lhx2<sup>+</sup> neurons in **(C)**;  
 756 *p* = 0.99 for Lhx9<sup>+</sup> neurons in **(D)**; by unpaired Student's *t* test.  
 757 **(E)** *In situ* hybridization of *cCbln1* in spinal cord cross-sections of St.23-24 chick embryos. Arrowheads  
 758 indicate the expression of *cCbln1* in DCNs. Scale bar, 50  $\mu\text{m}$ .  
 759

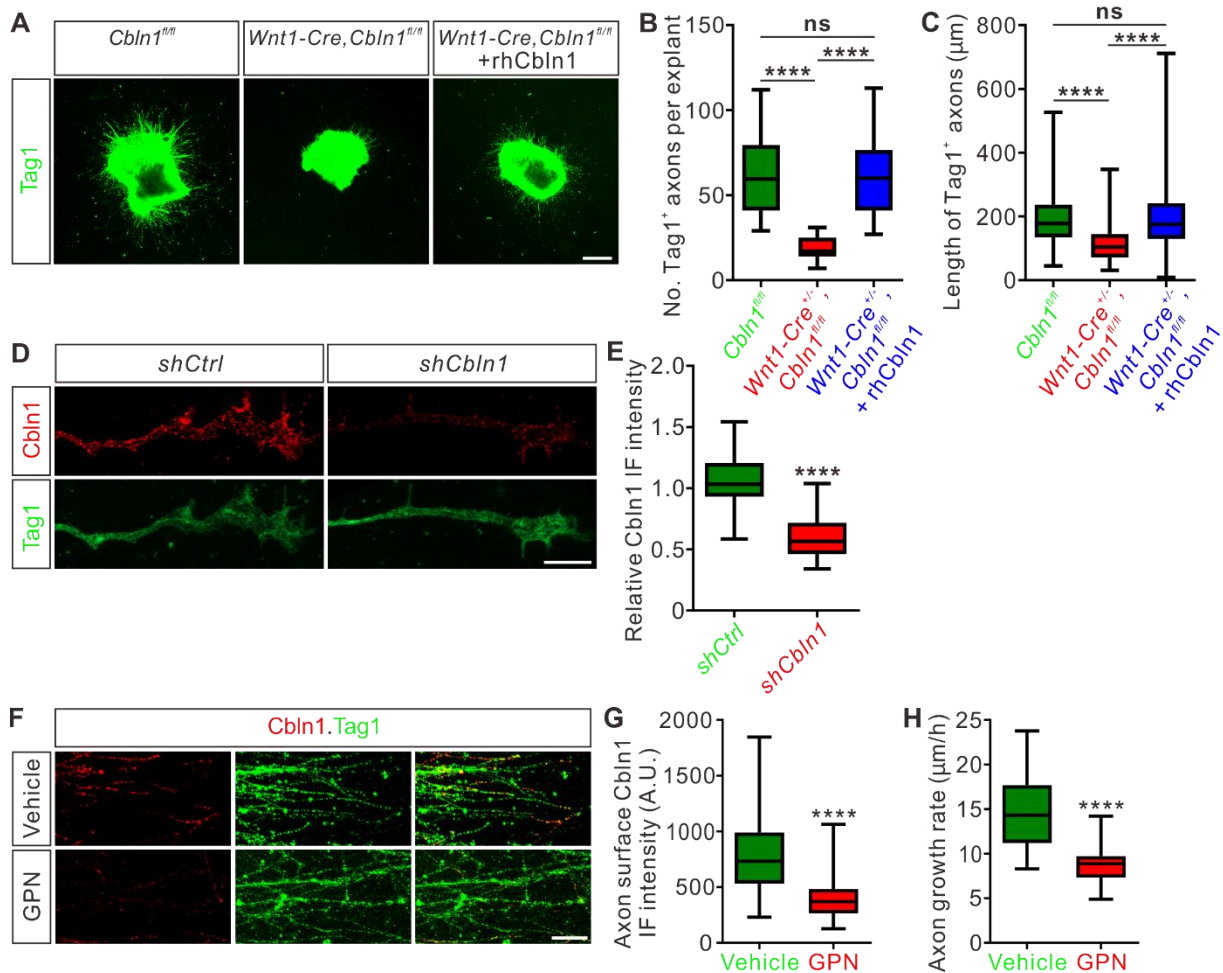

760

761 **Figure 3. Cbln1 is secreted from commissural axon growth cones and stimulates commissural axon**

762 **growth in an autocrine manner.**

763 **(A)** Extrinsic Cbln1 could rescue commissural axon growth defects caused by cell-autonomous  
764 ablation of *Cbln1* in the dorsal commissural neurons (DCN). DCN explants dissected from E10.5  
765 mouse embryos were cultured *in vitro* and commissural axon length was monitored by  
766 immunostaining of Tag1, a commissural axon marker. Compared with *Cbln1<sup>fl/fl</sup>*, DCN explants of  
767 *Wnt1-Cre<sup>+/-</sup>,Cbln1<sup>fl/fl</sup>* embryos showed significant commissural axon growth defects. These defects  
768 were rescued by adding the recombinant human Cbln1 protein (rhCbln1, 500 ng/ml) to the cultures.  
769 Scale bar, 200  $\mu$ m.

770 **(B, C)** Quantification of Tag1<sup>+</sup> commissural axon numbers and lengths in **(A)**. Data are represented as  
771 box and whisker plots. For **(B)**, \*\*\*\* $p$  = 1.69E-06, *Cbln1<sup>fl/fl</sup>* ( $n$  = 14 explants) vs *Wnt1-Cre<sup>+/-</sup>,Cbln1<sup>fl/fl</sup>* ( $n$   
772 = 14 explants); \*\*\*\* $p$  = 6.23E-07, *Wnt1-Cre<sup>+/-</sup>,Cbln1<sup>fl/fl</sup>* vs *Wnt1-Cre<sup>+/-</sup>,Cbln1<sup>fl/fl</sup>* + rhCbln1 ( $n$  = 16  
773 explants); ns, not significant ( $p$  = 0.99), *Cbln1<sup>fl/fl</sup>* vs *Wnt1-Cre<sup>+/-</sup>,Cbln1<sup>fl/fl</sup>* + rhCbln1. For **(C)**, \*\*\*\* $p$  =  
774 6.61E-11, *Cbln1<sup>fl/fl</sup>* ( $n$  = 876 axons) vs *Wnt1-Cre<sup>+/-</sup>,Cbln1<sup>fl/fl</sup>* ( $n$  = 274 axons); \*\*\*\* $p$  = 6.61E-11, *Wnt1-*  
775 *Cre<sup>+/-</sup>,Cbln1<sup>fl/fl</sup>* vs *Wnt1-Cre<sup>+/-</sup>,Cbln1<sup>fl/fl</sup>* + rhCbln1 ( $n$  = 1013 axons); ns, not significant ( $p$  = 0.91),  
776 *Cbln1<sup>fl/fl</sup>* vs *Wnt1-Cre<sup>+/-</sup>,Cbln1<sup>fl/fl</sup>* + rhCbln1. By one-way analysis of variance (ANOVA) followed by  
777 Tukey's multiple comparison test.

778 **(D)** Robust Cbln1 IF signals were detected in commissural axons and growth cones. Dissociated DCN  
779 neurons from E11 mouse embryos were cultured *in vitro* and Cbln1 IF signals were imaged after  
780 lentiviral shRNA infection. Loss of Cbln1 IF signals after *shCbln1* infection indicated the specificity of  
781 Cbln1 IF signals in commissural axons and growth cones. Scale bar, 10  $\mu$ m.

782 **(E)** Quantification of axonal Cbln1 IF signals in **(D)**. Data are represented as box and whisker plots:  
783 *shCtrl* ( $n$  = 55 axons) vs *shCbln1* ( $n$  = 68 axons), \*\*\*\* $p$  = 5.65E-31, by unpaired Student's *t* test.

784 **(F)** Cbln1 is exocytosed from commissural axons via lysosomes. Robust Cbln1 IF signals were detected  
785 on the commissural axon surface of cultured DCN explants and were eliminated after blocking  
786 exocytosis with GPN treatment for 10 min. Scale bar, 50  $\mu$ m.

787 **(G)** Quantification of axon surface Cbln1 IF signals in **(F)**. Data are represented as box and whisker  
788 plots: Vehicle ( $n$  = 140 axons) vs GPN ( $n$  = 126 axons), \*\*\*\* $p$  = 1.94E-26, by unpaired Student's *t* test.

789 **(H)** Blocking Cbln1 exocytosis in CA axons with GPN for 7 h inhibited CA axon growth. Data are  
790 represented as box and whisker plots: Vehicle ( $n = 75$  axons) vs GPN ( $n = 51$  axons),  $***p = 2.15E-20$ ,  
791 by unpaired Student's  $t$  test.  
792

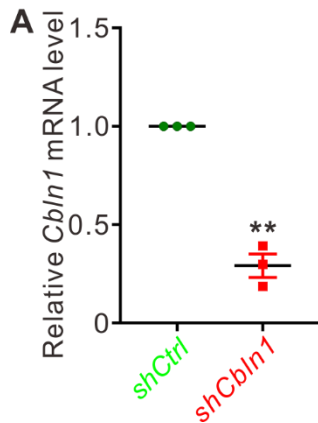

793

794 **Figure 3—figure supplement 1. Knockdown of mCbln1 using lentiviral shRNA.**

795 **(A)** Validation of knockdown of *Cbln1* using lentiviral *shCbln1*. Since Cbln1 is abundant in cerebellar  
796 granule cells, we prepared dissociated cerebellar granule cells from P8 mouse pups and cultured *in*  
797 *vitro* to test the knockdown efficiency of *shCbln1*. *Cbln1* mRNA levels were measured by RT-qPCR  
798 after lentiviral shRNA infection. Data are mean  $\pm$  SEM. and represented as dot plots:  $**p = 0.0070$ ; by  
799 unpaired Student's  $t$  test.

800

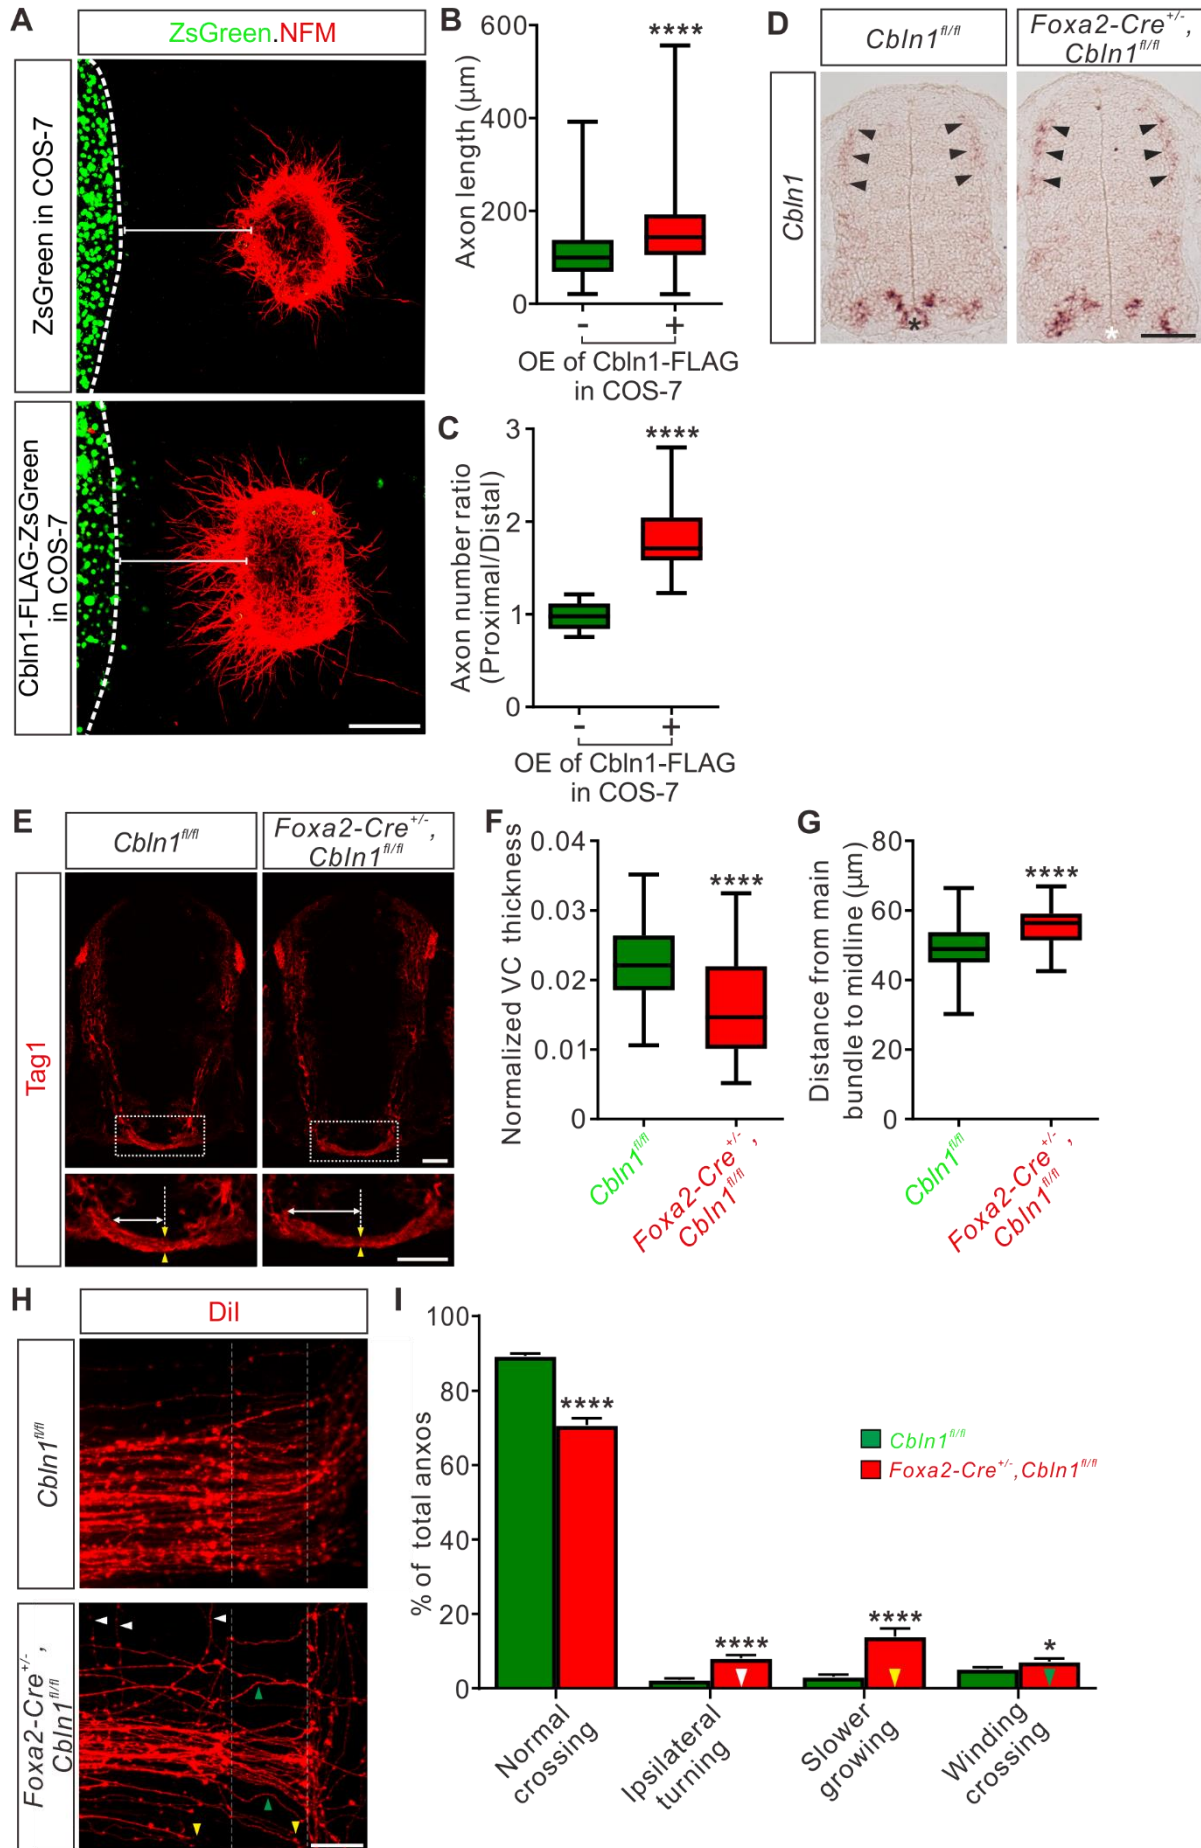

802 **Figure 4. Non-cell-autonomous Cbln1 from the floor plate regulates commissural axon guidance.**

803 **(A)** Co-culture of DCN explants from E11 mouse spinal cords with COS7 cell aggregates expressing

804 Cbln1-FLAG with ZsGreen or ZsGreen alone. Commissural axons were visualized with NFM

805 immunostaining. Cbln1 expression attracted commissural axon turning toward cell aggregates and

806 also enhanced axon growth. Scale bar, 200  $\mu\text{m}$ .

807 **(B, C)** Quantification of commissural axon growth and turning in **(A)** by measuring the axon length **(B)**

808 and the axon number ratio (proximal/distal) **(C)**. All data are represented as box and whisker plots:

809 for **(B)**, Ctrl ( $n = 1336$  axons) vs OE ( $n = 1051$  axons), \*\*\*\* $p = 1.93\text{E-}70$ ; for **(C)**, Ctrl ( $n = 16$  explants)

810 vs OE ( $n = 14$  explants), \*\*\*\* $p = 1.97\text{E-}08$ ; by unpaired Student's  $t$  test.

811 **(D)** Specific ablation of *Cbln1* in the floor plate of *Foxa2-Cre<sup>+/-</sup>, Cbln1<sup>fl/fl</sup>* cKO mouse embryos was

812 confirmed by *in situ* hybridization of E11.5 spinal cord sections. Expression of *Cbln1* in the floor plate

813 was completely lost in the cKO spinal cord (white asterisk) compared with the control embryos (black

814 asterisk). Black arrowheads indicate the unchanged *Cbln1* expression in DCNs of both genotypes.

815 Scale bar, 100  $\mu\text{m}$ .

816 **(E)** The axon guidance defects of pre-crossing commissural axons were observed by Tag1

817 immunostaining in floor plate-specific *Cbln1* cKO and control embryos at E11.5. Higher magnification

818 views of the floor plate region in the white dotted boxes are also shown (bottom). The pair of yellow

819 arrowheads denotes the thickness of the ventral commissure (VC). The double-arrowed line

820 measures the distance between the point of intersection (of the main pre-crossing commissural axon

821 bundle with the ventral edge of spinal cord) and the midline (indicated by the dotted line). Scale bars,

822 50  $\mu\text{m}$ .

823 **(F, G)** Quantification of the VC thickness and the distance from the main bundle intersection point to

824 the midline. The VC thickness was normalized to the height (dorsal to ventral) of spinal cord. All data

825 are represented as box and whisker plots: *Cbln1<sup>fl/fl</sup>* ( $n = 62$  sections) vs *Foxa2-Cre<sup>+/-</sup>, Cbln1<sup>fl/fl</sup>* ( $n = 60$

826 sections), \*\*\*\* $p = 1.69\text{E-}06$  for **(F)**, \*\*\*\* $p = 1.07\text{E-}07$  for **(G)**, by unpaired Student's  $t$  test.

827 **(H)** Dil labeling of E11.5 spinal cord open-books traced commissural axon guidance behaviors during  
828 midline crossing. The region between two white dotted lines indicates the floor plate. The white,  
829 yellow and green arrowheads indicate the commissural axons with aberrant behaviors such as  
830 ipsilateral turning, slower growing or winding crossing, respectively. Scale bar, 50  $\mu$ m.

831 **(I)** Quantification of the percentages of commissural axons with different guidance behaviors. All  
832 data are mean  $\pm$  SEM. and represented as histogram: *Cbln1*<sup>fl/fl</sup> ( $n = 45$  Dil injections) vs *Foxa2-Cre*<sup>+/-</sup>  
833 , *Cbln1*<sup>fl/fl</sup> ( $n = 32$  Dil injections), \*\*\*\* $p = 3.36E-17$  for normal crossing, \*\*\*\* $p = 8.86E-10$  for ipsilateral  
834 turning, \*\*\*\* $p = 6.14E-07$  for slower growing, \* $p = 0.033$  for winding crossing, by unpaired Student's  
835  $t$  test.

836

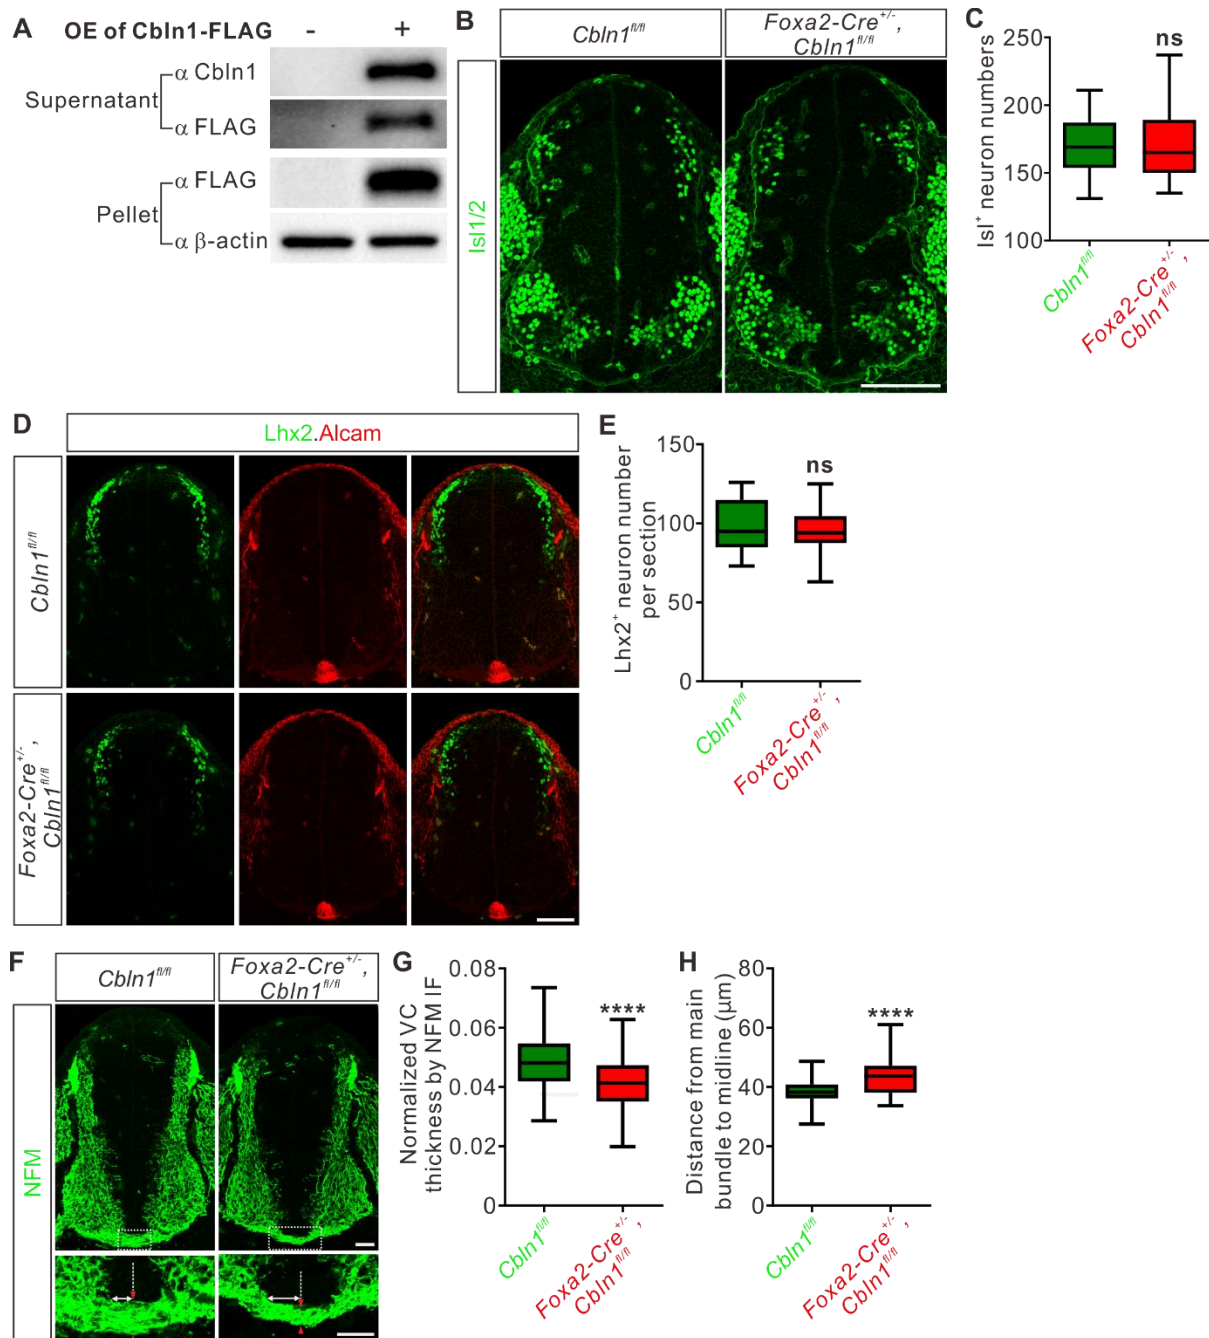

837

838 **Figure 4—figure supplement 1. Floor plate-specific *Cbln1* cKO does not disturb neural patterning or**  
 839 **neurogenesis in the developing spinal cord.**

840 **(A)** Overexpression and secretion of Cbln1 tagged by FLAG in COS7 cells were validated by WB.

841 **(B, C)** Isl1/2 immunostaining showed normal patterning of spinal cord in the floor plate-specific *Cbln1*

842 cKO embryos **(B)**. Isl1/2 marks different interneurons and motor neurons in spinal cord. Scale bar,

843 100  $\mu$ m. The data for quantification of Isl1/2<sup>+</sup> neuron numbers are represented as box and whisker



844 plots **(C)**: *Cbln1<sup>fl/fl</sup>* ( $n = 42$  sections) vs *Foxa2-Cre<sup>+/-</sup>;Cbln1<sup>fl/fl</sup>* ( $n = 49$  sections); ns, not significant ( $p =$   
845 0.93); by unpaired Student's  $t$  test.

846 **(D, E)** The floor plate-specific cKO of *Cbln1* does not disturb DCN neurogenesis, spinal cord patterning,  
847 or floor plate development. *Lhx2* and *Alcam* immunostainings of E11.5 spinal cord were used to mark  
848 dl1 commissural neurons and floor plate, respectively **(D)**. Scale bar, 100  $\mu\text{m}$ . The data for  
849 quantification of *Lhx2*<sup>+</sup> neuron numbers are represented as box and whisker plots **(E)**: *Cbln1<sup>fl/fl</sup>* ( $n = 16$   
850 sections) vs *Foxa2-Cre<sup>+/-</sup>;Cbln1<sup>fl/fl</sup>* ( $n = 35$  sections); ns, not significant ( $p = 0.59$ ); by unpaired Student's  
851  $t$  test.

852 **(F)** The axon guidance defects of pre-crossing commissural axons were observed by NFM  
853 immunostaining in floor plate-specific *Cbln1* cKO and control embryos at E11.5. Higher magnification  
854 views of the FP region in the white dotted boxes are also shown (bottom). The pair of red  
855 arrowheads denotes the thickness of the ventral commissure (VC). The double-arrowed line  
856 measures the distance between the point of intersection (of the main pre-crossing commissural axon  
857 bundle with the ventral edge of spinal cord) and the midline (indicated by the dotted line). Scale bars,  
858 50  $\mu\text{m}$ .

859 **(G, H)** Quantification of the VC thickness and the distance from the main bundle intersection point to  
860 the midline. All data are represented as box and whisker plots: *Cbln1<sup>fl/fl</sup>* ( $n = 49$  sections) vs *Foxa2-*  
861 *Cre<sup>+/-</sup>;Cbln1<sup>fl/fl</sup>* ( $n = 74$  sections), \*\*\* $p = 3.86\text{E-}05$  for **(G)**, \*\*\* $p = 1.35\text{E-}07$  for **(H)**, by unpaired  
862 Student's  $t$  test.

863

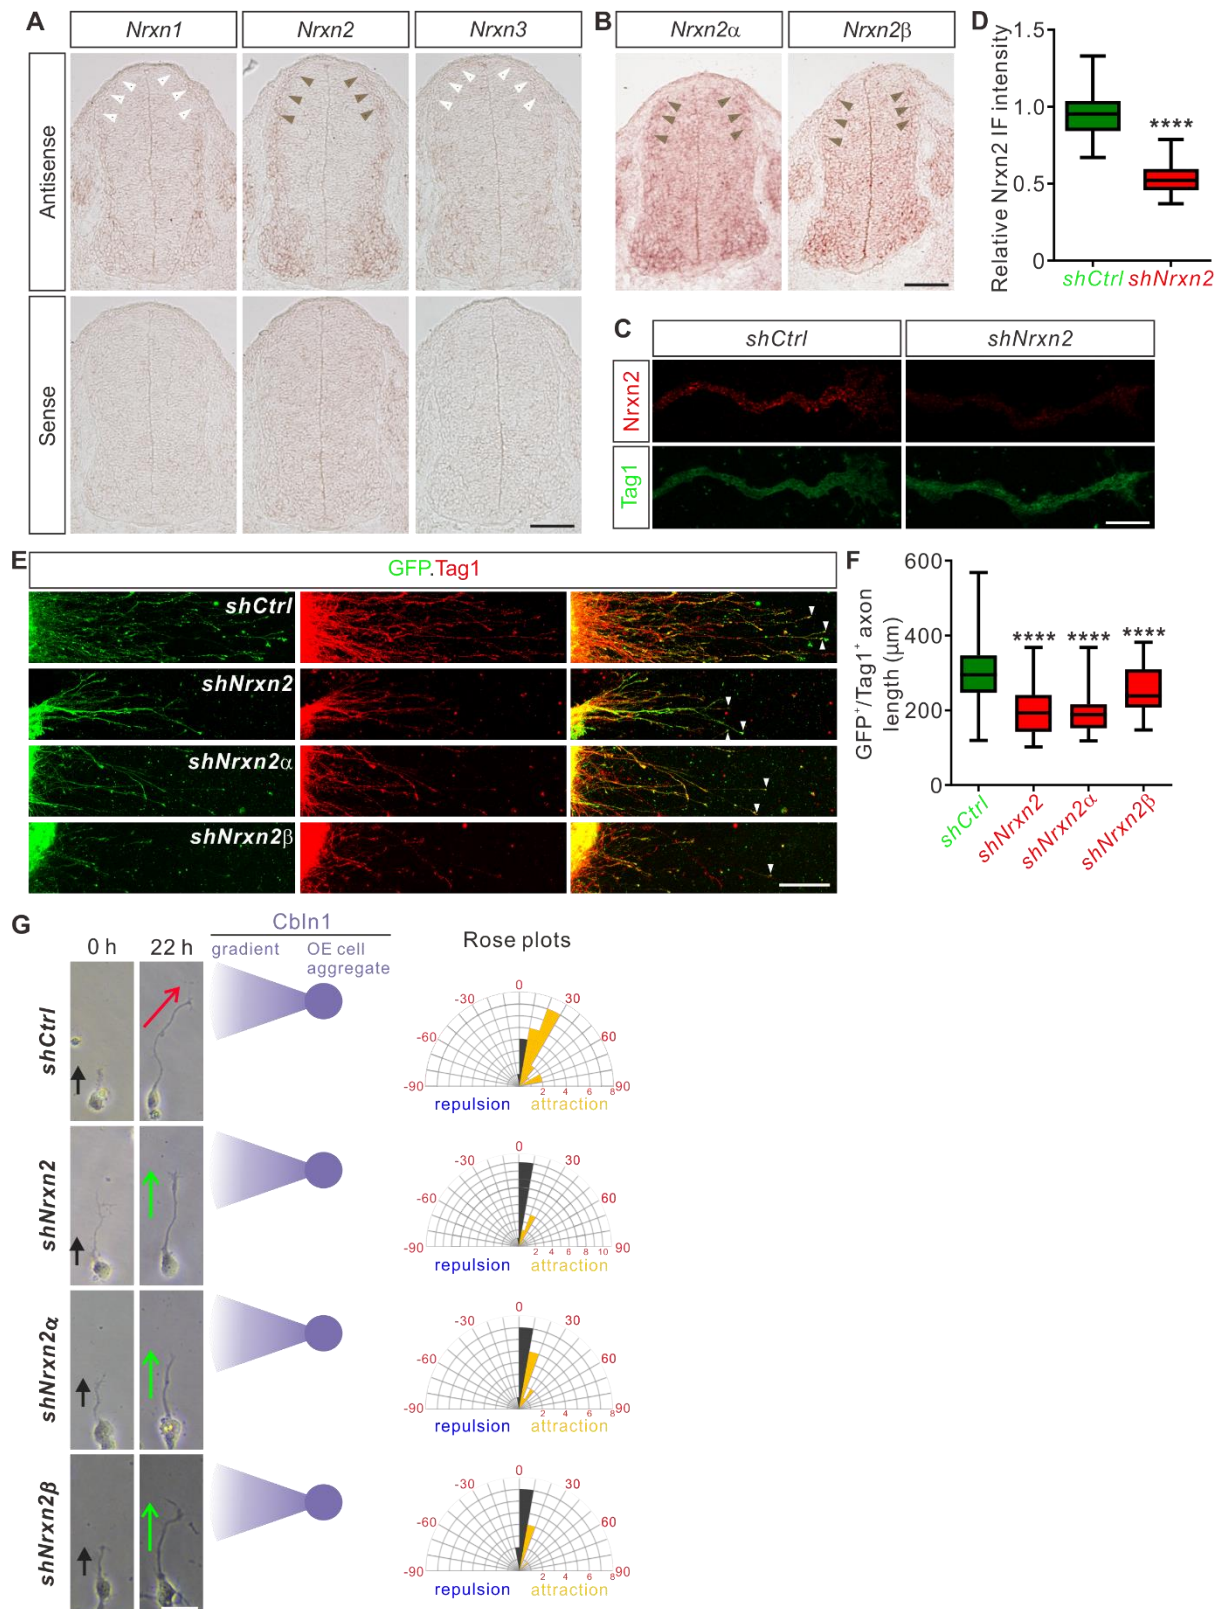

864

865 **Figure 5. Nrnx2 mediates Cbln1-induced commissural axon growth and guidance as its receptor.**

866 (A, B) *Nrxn2*, *Nrxn2α* and *Nrxn2β* mRNAs were detected in E11.5 spinal cord cross-sections by *in situ*

867 hybridization. Brown and white arrowheads indicate the expression (*Nrxn2* in A, *Nrxn2α* and *Nrxn2β*

868 in **B**) or absence (*Nrxn1* and *Nrxn3* in **A**) of the corresponding mRNAs in DCNs, respectively. Scale bars,  
869 100  $\mu\text{m}$ .

870 **(C)** Robust *Nrxn2* IF signals were detected in the commissural axons and growth cones. Dissociated  
871 DCN neurons from E11 mouse embryos were cultured *in vitro* and *Nrxn2* IF signals were imaged after  
872 lentiviral shRNA infection. Loss of *Nrxn2* IF signals after *shNrxn2* infection indicated the specificity of  
873 *Nrxn2* IF signals in the commissural axons and growth cones. Scale bar, 10  $\mu\text{m}$ .

874 **(D)** Quantification of axonal *Nrxn2* IF signals in **(C)**. Data are represented as box and whisker plots:  
875 *shCtrl* ( $n = 69$  axons) vs *shNrxn2* ( $n = 65$  axons), \*\*\*\* $p = 3.75\text{E-}39$ , by unpaired Student's *t* test.

876 **(E)** Knockdown of *Nrxn2*, *Nrxn2 $\alpha$*  or *Nrxn2 $\beta$*  in DCNs inhibited commissural axon growth. Axons of  
877 DCN neurons which were infected by shRNA against *Nrxn2* were marked by both GFP reporter and  
878 Tag1 IF. White arrowheads indicate the axon terminals. Scale bar, 100  $\mu\text{m}$ .

879 **(F)** Lengths of GFP<sup>+</sup>/Tag1<sup>+</sup> commissural axons in **(E)** were measured and analyzed. Data are  
880 represented as box and whisker plots: *shCtrl* ( $n = 63$  axons) vs *shNrxn2* ( $n = 53$  axons), \*\*\*\* $p = 1.41\text{E-}$   
881  $15$ ; *shCtrl* vs *shNrxn2 $\alpha$*  ( $n = 48$  axons), \*\*\*\* $p = 4.30\text{E-}18$ ; *shCtrl* vs *shNrxn2 $\beta$*  ( $n = 48$  axons), \*\*\*\* $p =$   
882  $6.27\text{E-}05$ ; by one-way analysis of variance (ANOVA) followed by Tukey's multiple comparison test.

883 **(G)** Knockdown of *Nrxn2*, *Nrxn2 $\alpha$*  or *Nrxn2 $\beta$*  in DCNs disturbed commissural axon turning toward  
884 Cbln1-expressing cell aggregates. Dissociated DCN neurons from E11 mouse spinal cords were  
885 infected with shRNAs, and co-cultured with COS7 cell aggregates expressing Cbln1. Commissural  
886 axons were imaged at two time points (0 and 22 h). Commissural axon turning angles toward the  
887 Cbln1-OE cell aggregates and gradients were measured between the colored arrow (red for *shCtrl*  
888 and green for *shNrxn2s*) at 22 h and the black arrow at 0 h. Rose plots of axon turning angles are  
889 shown to the right for each condition. Angles were clustered in bins of 10°, and the number of axons  
890 per bin is represented by the radius of each segment. Orange bins indicate attraction, and blue bins  
891 indicate repulsion. Scale bar, 20  $\mu\text{m}$ .

892

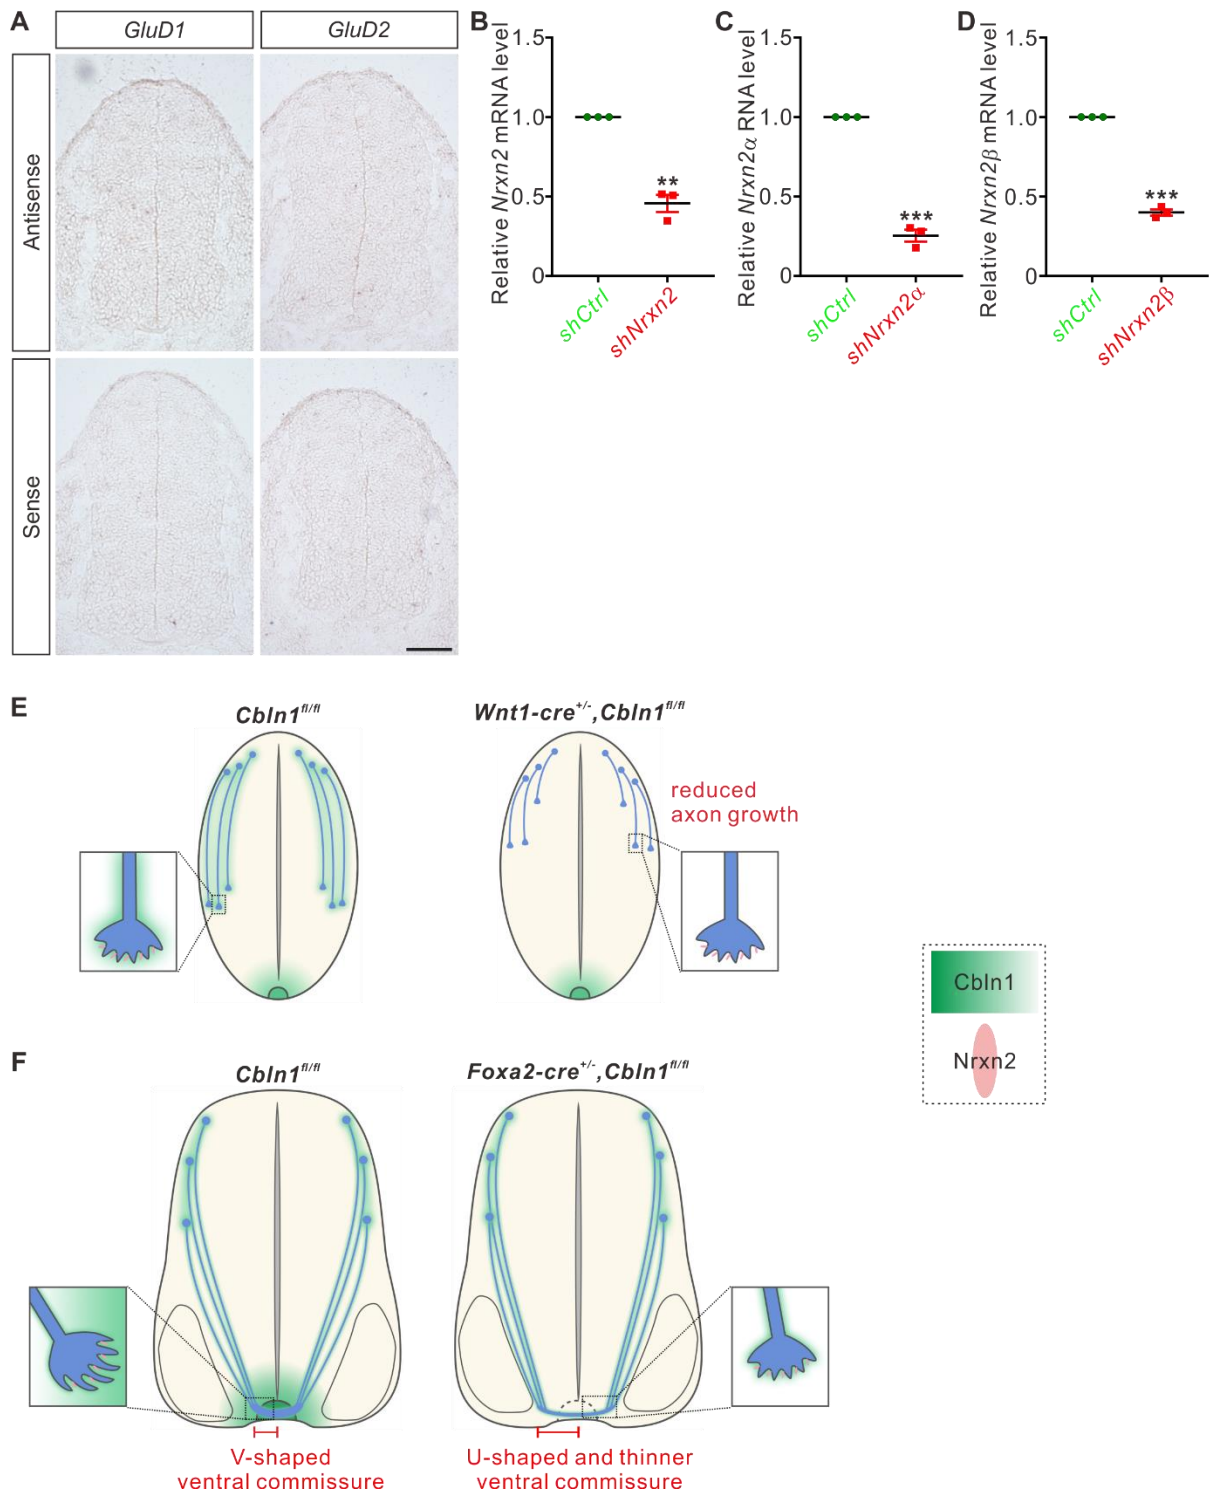

893

894 **Figure 5—figure supplement 1. Working models for cell-autonomous and non-cell-autonomous**

895 ***Cbln1* in the developing spinal cord.**

896 **(A)** *GluD1* or *GLuD2* mRNA was not detected in E11.5 spinal cord cross-sections by *in situ*

897 hybridization. Scale bar, 100  $\mu$ m.

898 **(B-D)** Validation of knockdown by shRNAs. Dissociated cerebellar granule cells from P8 mouse pups  
899 were cultured and lentiviral shRNAs were infected. Significant knockdown was achieved by shRNAs  
900 against *Nrxn2*, *Nrxn2 $\alpha$*  and *Nrxn2 $\beta$* , respectively. RT-qPCR data are mean  $\pm$  SEM. and represented as  
901 dot plots:  $**p = 0.0084$  for **(B)**;  $***p = 0.00010$  for **(C)**;  $***p = 0.00020$  for **(D)**; by unpaired Student's  
902 *t* test.

903 **(E)** Working model for the stimulation of commissural axon growth by the cell-autonomous Cbln1. In  
904 the pre-crossing commissural axons, Cbln1 is expressed cell-autonomously by the dorsal commissural  
905 neurons and axons. Commissural axon growth cone-secreted Cbln1 works back to itself in an  
906 autocrine manner and binds to Nrxn2 receptors to stimulate commissural axon growth. In the DCN-  
907 specific *Cbln1* cKO embryos, commissural axon growth is reduced compared with their littermate  
908 controls.

909 **(F)** Working model for the attraction of commissural axon growth toward midline by the non-cell-  
910 autonomous, floor plate-derived Cbln1. When commissural axons approach the midline, the floor  
911 plate-derived Cbln1 attracts commissural axons to the midline which is also mediate by Nrxn2  
912 receptors. In the floor plate-specific *Cbln1* cKO embryos, commissural axon guidance in the midline  
913 crossing is impaired, resulting in a U-shaped and thinner ventral commissure compared with the V-  
914 shaped and thick ventral commissures in the littermate control embryos.

915

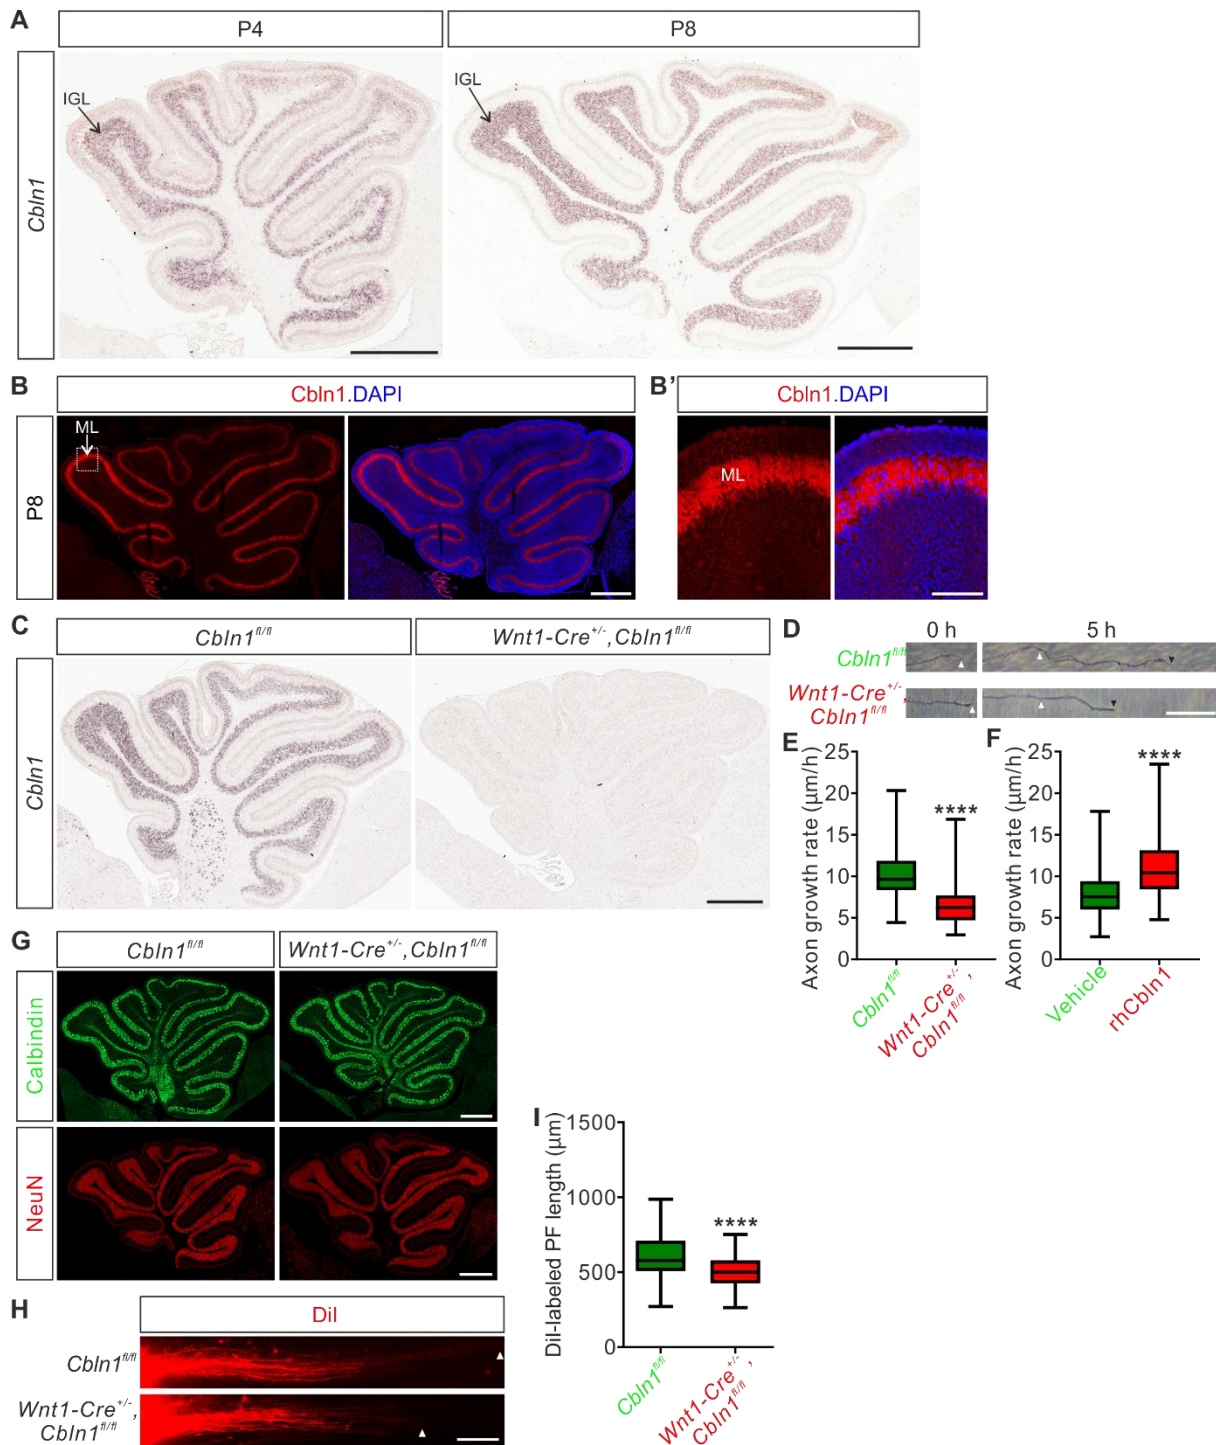

916

917 **Figure 6. Cell-autonomous Cbln1 is required for cerebellar granule cell axon growth.**

918 **(A)** *In situ* hybridization of *Cbln1* in cerebella during P4 and P8. *Cbln1* mRNA is specifically and highly

919 expressed in granule cells, esp. in the inner granule layer (IGL). Scale bars, 500 µm.

920 **(B)** High level of Cbln1 protein is detected in the molecular layer (ML) of P8 cerebellum, which is  
921 expressed and secreted by granule cell (GC) axons. Higher magnification of the boxed area is shown  
922 in **(B')**. Scale bars, 500  $\mu\text{m}$  **(B)** and 100  $\mu\text{m}$  **(B')**.

923 **(C)** Ablation of *Cbln1* expression in *Cbln1* cKO mouse cerebella. *In situ* hybridization of *Cbln1* in P8  
924 cerebellum confirmed the ablation of *Cbln1* from IGL. Scale bar, 500  $\mu\text{m}$ .

925 **(D, E)** Cell-autonomous Cbln1 is required for GC axon growth. P6 GC neurons were dissected and  
926 cultured *in vitro*. GC axons were imaged at two time points (0 and 5 h). The growth rate of GC axons  
927 from *Cbln1* cKO cerebella was significantly slower than that of control. Quantification data are  
928 represented as box and whisker plots **(E)**: *Cbln1<sup>fl/fl</sup>* ( $n = 298$  axons) vs *Wnt1-Cre<sup>+/-</sup>,Cbln1<sup>fl/fl</sup>* ( $n = 247$   
929 axons); \*\*\*\* $p = 4.05\text{E-}52$ ; by unpaired Student's *t* test. Scale bar, 20  $\mu\text{m}$ .

930 **(F)** Extrinsic Cbln1 could stimulate GC axon growth. WT P6 GC neurons were cultured *in vitro* and  
931 rhCbln1 (500 ng/ml) was added to the culture. Compared with the vehicle control, rhCbln1  
932 significantly enhanced GC axon growth. Data are represented as box and whisker plots: Vehicle ( $n =$   
933 342 axons) vs rhCbln1 ( $n = 299$  axons); \*\*\*\* $p = 5.58\text{E-}32$ ; by unpaired Student's *t* test.

934 **(G)** Neurogenesis is not disturbed in the *Cbln1* cKO cerebellum at P8. Immunostainings of the  
935 Purkinje cell marker Calbindin and the granule cell marker NeuN showed no difference between  
936 *Cbln1* cKO and control cerebella, suggesting that the neurogenesis of PCs and GCs in cerebellum is  
937 not affected. Scale bars, 500  $\mu\text{m}$ .

938 **(H, I)** Lengths of parallel fibers labeled by Dil were significantly decreased in *Cbln1* cKO mice at P6.  
939 The white arrowheads indicate the terminals of Dil-labeled PFs. Quantification of PF lengths is shown  
940 as box and whisker plots **(I)**: \*\*\*\* $p = 1.09\text{E-}13$ ;  $n = 190$  axons for *Cbln1<sup>fl/fl</sup>* mice,  $n = 132$  axons for  
941 *Wnt1-Cre<sup>+/-</sup>,Cbln1<sup>fl/fl</sup>* mice; by unpaired Student's *t*-test. Scale bar, 100  $\mu\text{m}$ .

942

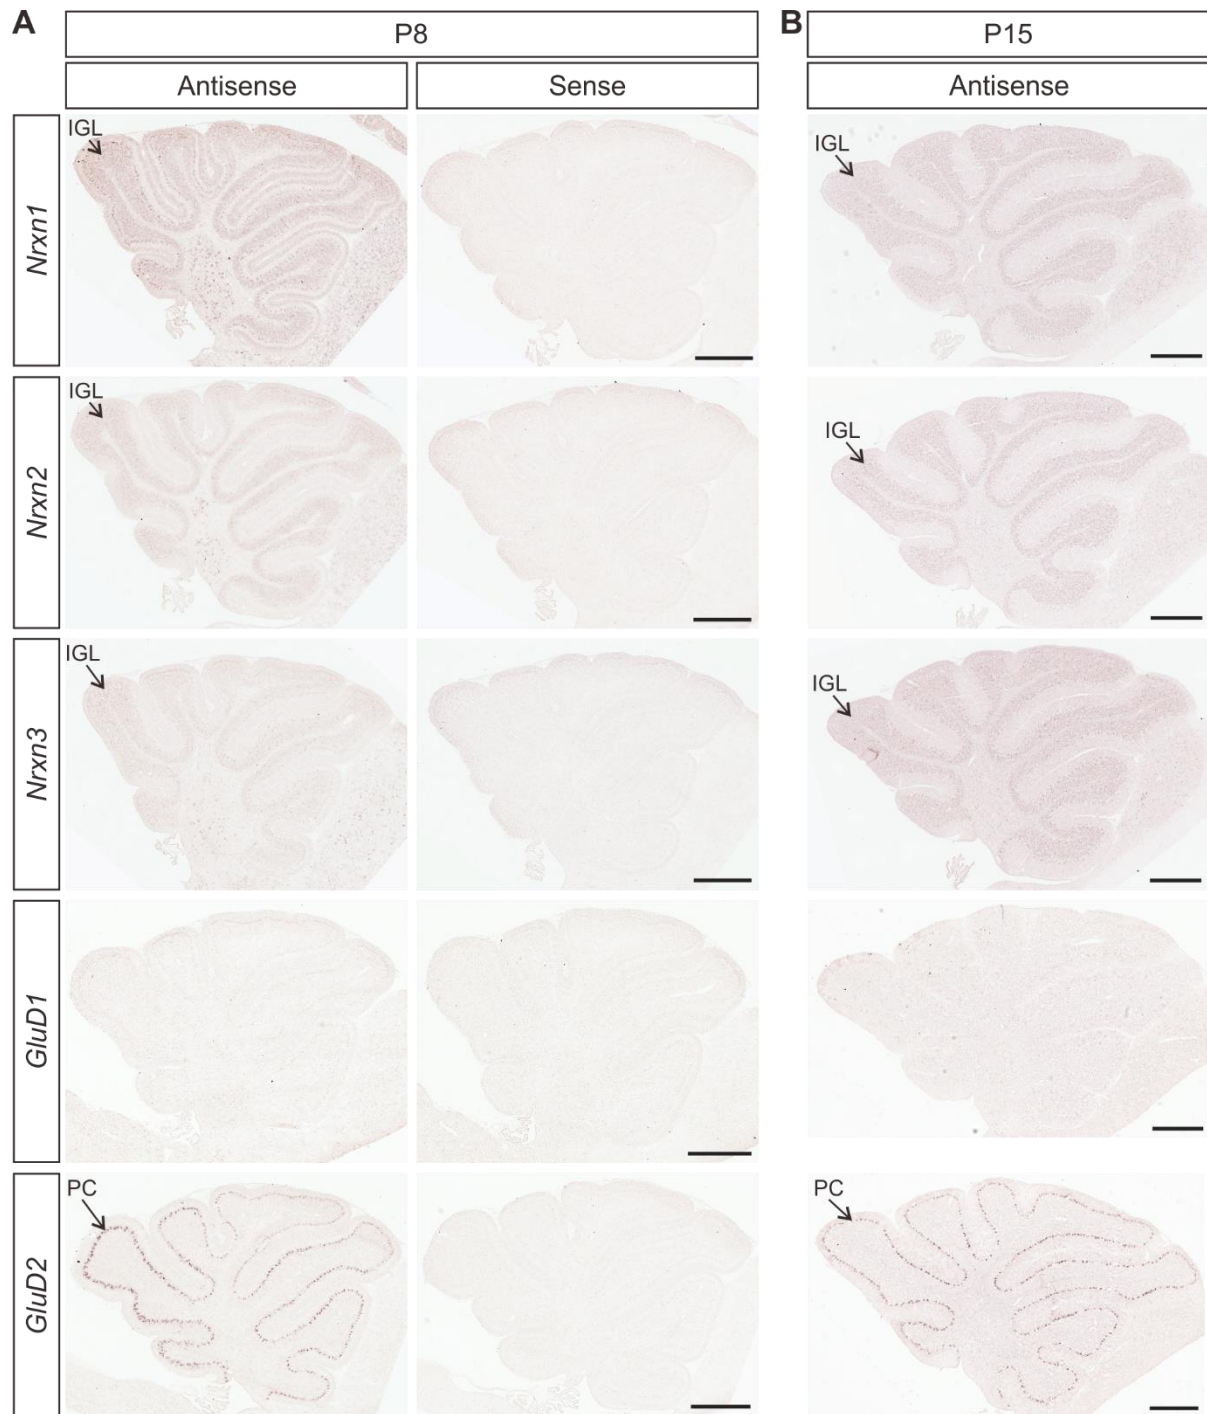

943

944 **Figure 6—figure supplement 1. Expression of Cbln1 receptors in the developing cerebellum.**

945 **(A, B)** *In situ* hybridization of *Nrnx1*, *Nrnx2*, *Nrnx3*, *GluD1* and *GluD2* in cerebella at P8 (A) and P15 (B).

946 *Nrnx1*, *Nrnx2* and *Nrnx3* mRNAs were detected in the inner granule layer (IGL). *GluD2* mRNA was

947 highly and specifically expressed in the Purkinje cells (PCs) while *GluD1* mRNA was not detected in

948 the cerebellum at these stages. Scale bars, 500 μm.

949



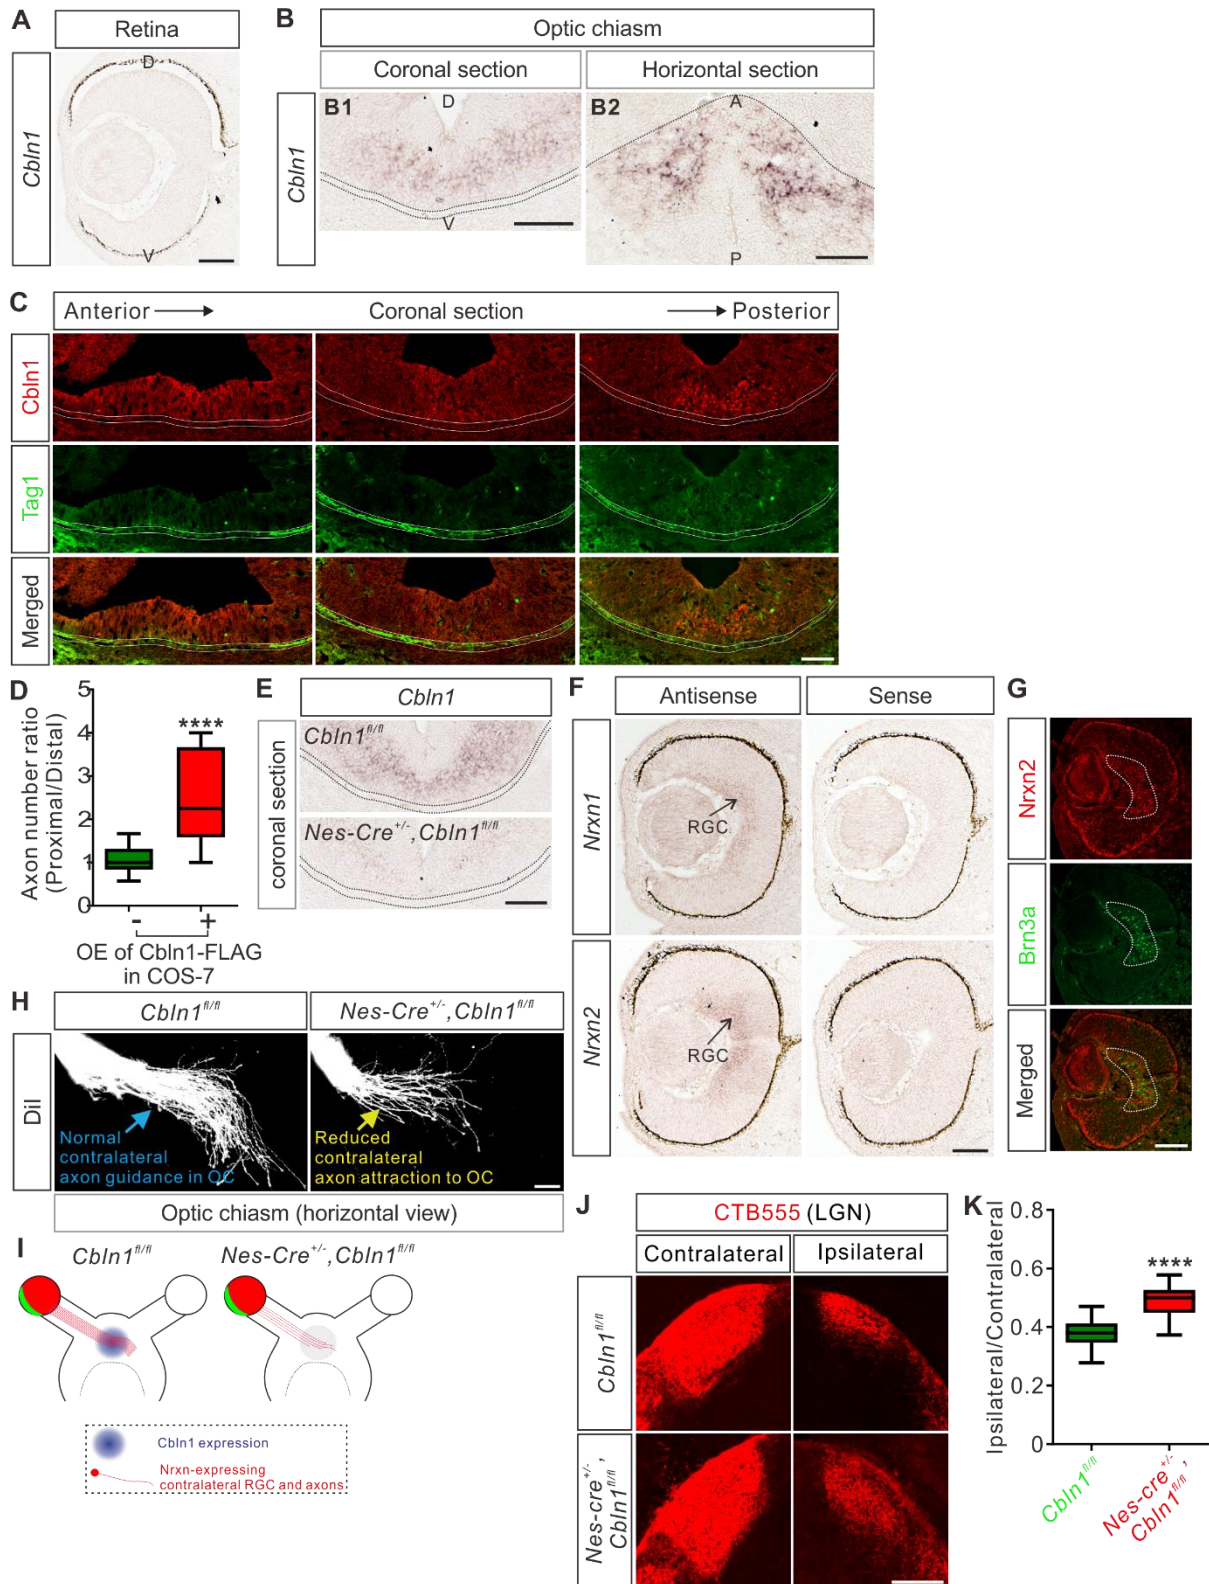

950

951 **Figure 7. Non-cell-autonomous Cbln1 regulates RGC axon guidance in optic chiasm.**

952 **(A)** *In situ* hybridization of *Cbln1* in the developing retina. *Cbln1* mRNA expression was not detected

953 in the retina of E13 mouse embryos. D, dorsal; V, ventral. Scale bar, 100  $\mu$ m.

954 **(B)** *In situ* hybridization of *Cbln1* in E13 mouse brain sections (coronal section for **B1**; horizontal  
955 section for **B2**). *Cbln1* mRNA expression was detected in the floor of the third ventricle, adjacent to  
956 the optic chiasm. The dotted lines indicate the boundary of the optic chiasm. D, dorsal; V, ventral; A,  
957 anterior; P, posterior. Scale bars, 100  $\mu$ m.

958 **(C)** Immunostaining of Cbln1 in coronal brain sections from E13 mouse embryos. Cbln1 protein was  
959 detected in the floor of the third ventricle, adjacent to the optic chiasm. Tag1-marked RGC axons  
960 projected to the optic chiasm are outlined by the dotted lines. Serial sections from anterior level to  
961 posterior level were shown. Scale bar, 100  $\mu$ m.

962 **(D)** Extrinsic Cbln1 attracted RGC turning *in vitro*. Retina explants from E13 mouse embryos were co-  
963 cultured with COS7 cell aggregates expressing Cbln1-FLAG with GFP or GFP alone. Quantification of  
964 RGC axon turning was performed by measuring the axon number ratio (proximal/distal), similarly as  
965 CA axon guidance assay. Data are represented as box and whisker plots: Ctrl ( $n = 17$  explants) vs OE  
966 ( $n = 9$  explants), \*\*\* $p = 5.62E-05$ ; by unpaired Student's *t* test.

967 **(E)** Ablation of *Cbln1* in *Nes-Cre<sup>+/-</sup>, Cbln1<sup>fl/fl</sup>* cKO mouse embryos was confirmed by *in situ* hybridization  
968 of E13 coronal brain sections. The dotted lines indicate the boundary of the optic chiasm. Scale bar,  
969 100  $\mu$ m.

970 **(F)** *In situ* hybridization of *Nrxn1* and *Nrxn2* in E13 retina. *Nrxn1* and *Nrxn2* mRNAs were detected in  
971 retinal ganglion cells (RGC). Scale bar, 100  $\mu$ m.

972 **(G)** Immunostaining of *Nrxn2* in E13 retina. *Nrxn2* is expressed only in the contralateral RGCs marked  
973 by Brn3a. Scale bar, 100  $\mu$ m.

974 **(H, I)** Axon guidance defects in the optic chiasm (OC) of *Cbln1* cKO embryos. Dil tracing of RGC axons  
975 was performed to visualize axon trajectory in OC. Compared with normal axon attraction of  
976 contralateral RGCs in OC of control embryos, *Cbln1* cKO embryos showed reduced axon attraction to  
977 OC. The phenotype is illustrated in **(I)**. Scale bar, 100  $\mu$ m.

978 **(J, K)** RGC central targeting defects of *Cbln1* cKO mice. Representative images of coronal sections  
979 through the LGN (lateral geniculate nucleus) after unilateral injection of CTB-Alexa Fluor 555 at P4 in

980 *Cbln1* cKO and control mice were shown and projections to the contralateral and ipsilateral LGN are  
981 visible (J). Quantification of “Ipsilateral area”/“Contralateral area” is represented as box and whisker  
982 plot (K): Ctrl ( $n = 51$  sections) vs cKO ( $n = 53$  sections), \*\*\*\* $p = 2.06E-18$ ; by unpaired Student’s  $t$  test.  
983 Scale bar, 200  $\mu\text{m}$ .  
984

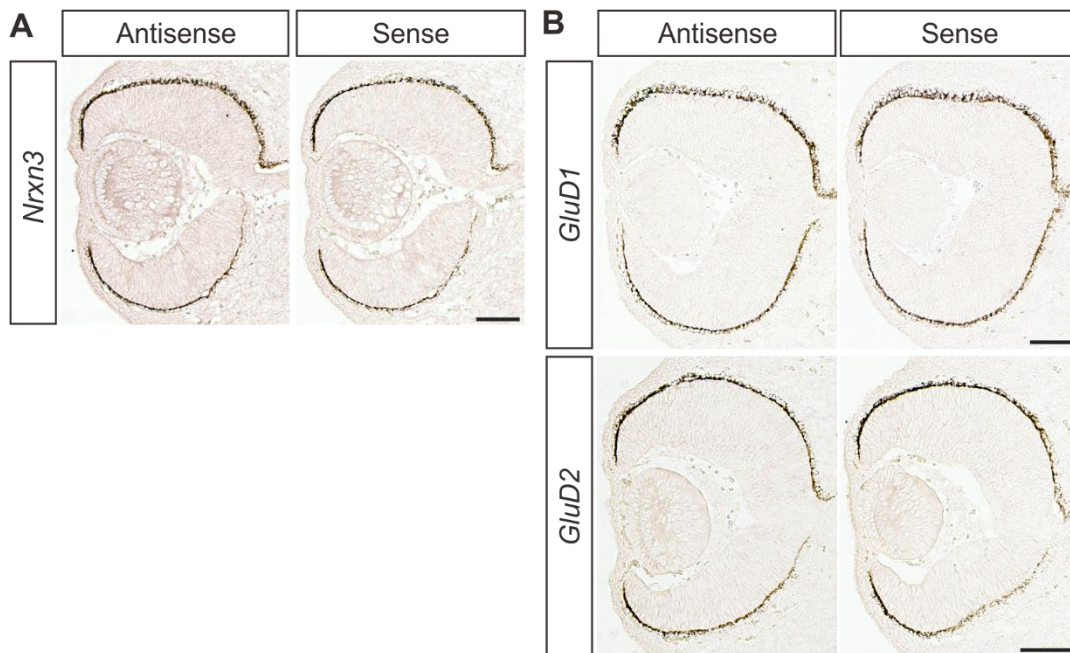

985  
986 **Figure 7—figure supplement 1. *In situ* hybridization of *Cbln1* receptors in the developing retina.**  
987 **(A, B) *In situ* hybridization of *Nrxn3* (A), and *GluD1* and *GluD2* (B) in E13 retina. *Nrxn3*, *GluD1* or**  
988 ***GluD2* mRNA was not detected in the developing retina. Scale bars, 100  $\mu\text{m}$ .**

989  
990  
991 **Supplementary file 1. Differentially expressed genes in the dorsal spinal cord of mouse embryos.**

992 See the separate Excel data set

993
